1 The effect of *in vitro* culture on unicellular eukaryotes: adaptation of *Trypanosoma brucei*  
2 *brucei* bloodstream forms results in gene copy-number changes.

3

4 <sup>1</sup>Julius Mulindwa, <sup>2</sup>Geofrey Ssentamu, <sup>2</sup>Enock Matovu <sup>3</sup>Kevin Kamanyi Marucha#,  
5 <sup>4</sup>Francisco Aresta-Branco, <sup>3</sup>Claudia Helbig, <sup>3</sup>Christine Clayton.

6

7 <sup>1</sup>Department of Biochemistry and Sports Science, College of Natural Sciences, Makerere  
8 University, P.O.Box 7062, Kampala, Uganda

9 <sup>2</sup>School of Biosecurity, Biotechnical and Laboratory Sciences, College of Veterinary  
10 Medicine, Animal Resources and Biosecurity, Makerere University, P.O. Box 7062,  
11 Kampala, Uganda

12 <sup>3</sup>Heidelberg University Centre for Molecular Biology (ZMBH), Im Neuenheimer Feld 282, D-  
13 69120 Heidelberg, Germany

14 <sup>4</sup>Division of Immune Diversity, Deutsche Krebsforschungszentrum (DKFZ), Im Neuenheimer  
15 Feld 280, D69120 Heidelberg, Germany.

16

17 #current address: Kisii University Medical Biochemistry, P.O. Box 408, 40200 Kisii, Kenya.

18

19 \*to whom correspondence should be addressed. e-mail [cclayton@zmbh.uni-heidelberg.de](mailto:cclayton@zmbh.uni-heidelberg.de),

20 tel +49 6221 546876

21

22

## 23 **Abstract**

24 Most researchers who study unicellular eukaryotes work with an extremely limited number of  
25 laboratory-adapted isolates that were obtained from the field decades ago, but the effects of  
26 passage in laboratory rodents, and adaptation to *in vitro* culture, have been little studied. For  
27 example, the vast majority of studies of *Trypanosoma brucei* biology have concentrated on  
28 just two strains, Lister 427 and EATRO1125, which were taken from the field over half a  
29 century ago and have since have undergone innumerable passages in rodents and culture.  
30 We here describe two new *Trypanosoma brucei brucei* strains. MAK65 and MAK98, which  
31 have undergone only 3 rodent passages since isolation from Ugandan cattle. Adaptation of  
32 these strains to culture was accompanied by changes in gene copy numbers, some of which  
33 were also evident when other lab-adapted strains, field isolates of *T. rhodesiense*, and the  
34 genome strain TREU927 were compared. Reproducible increases were seen for genes  
35 encoding histones, enzymes of mRNA processing and degradation, the cytosolic chaperone  
36 HSP70, and two proteins required for the DNA damage response. These results indicate that  
37 similar work with other eukaryotic pathogens would be worthwhile. Meanwhile, the two new  
38 *T. brucei* strains should be useful to researchers interested in trypanosome differentiation  
39 and pathogenicity. They have differing pathogenicities in mice and may also differ in their  
40 propensity for stumpy-form differentiation, as judged by morphology and mRNA expression.  
41 MAK65 grows better than MAK98 in bloodstream-form culture, and is uniformly diploid,  
42 whereas MAK98 is triploid for chromosome 5. Genome sequence exceeding 100-fold  
43 coverage is available for both strains.

## 44 **Introduction**

45 *Trypanosoma brucei brucei* and related parasites infect humans and various domestic  
46 animals, and can be transmitted mechanically and venereally as well as by their definitive  
47 host, the Tsetse fly. *T. brucei gambiense* is the subspecies that causes West African  
48 sleeping sickness, while *T. brucei rhodesiense* causes East African sleeping sickness. *T.*  
49 *brucei brucei* is found in cattle, but not humans; it differs from *T. brucei rhodesiense* only in  
50 the absence of the *SRA* gene, which enables *T. rhodesiense* to survive in human plasma [1,  
51 2]. Within Tsetse flies, *T. brucei* multiply as procyclic forms in the midgut, before migrating to  
52 the salivary glands, where sexual reproduction occurs, with meiosis and gamete formation,  
53 followed by gamete fusion [3, 4].

54 The *Trypanosoma brucei* genome consists of eleven megabase-length chromosomes, which  
55 are generally diploid, and a variable number of "minichromosomes". The parasite escapes  
56 the immune response by antigenic variation, expressing a single Variant Surface  
57 Glycoprotein (VSG). The expressed VSG gene is located at a telomere, and can be changed  
58 either through transcriptional switching or, more commonly, by genetic rearrangement. Every  
59 parasite has at least 1000 alternative VSG genes or pseudogenes, which are located in sub-  
60 telomeric arrays and on the minichromosomes [5]. DNA contents vary up to 30% between *T.*  
61 *brucei* isolates [6]. Although some of this can be attributed to differing minichromosome  
62 contents [6], the lengths of the megabase chromosomes also differ substantially both within,  
63 and between, strains [6-8]. Variations in the numbers of VSG genes are to be expected, but  
64 there are also other differences. Some genes are arranged in multi-copy arrays, which  
65 facilitates high expression but also leaves the genes prone to homologous recombination.  
66 For example, the beta- and alpha-tubulin genes are present in an alternating array, and one  
67 study found fewer copies in *T. brucei gambiense* than in *T. brucei rhodesiense* or *T. brucei*  
68 *brucei* [6]. The chromosome copy number might be expected to be made more uniform by  
69 meiosis and mating, but although classical Mendelian inheritance is seen [9], triploid progeny  
70 also appear to be relatively common [10, 11]; also, the sexual stage is not obligatory.

71 In the past few decades, nearly all studies of *T. brucei* molecular and cellular biology have  
72 used just two strains: Lister 427, which was probably originally isolated from a cow in 1956  
73 (see [http://tryps.rockefeller.edu/DocumentsGlobal/lineage\\_Lister427.pdf](http://tryps.rockefeller.edu/DocumentsGlobal/lineage_Lister427.pdf)), and EATRO1125,  
74 which was isolated from a bushbuck in 1966 (see

75 [http://tryps.rockefeller.edu/DocumentsGlobal/lineage\\_antat1.pdf](http://tryps.rockefeller.edu/DocumentsGlobal/lineage_antat1.pdf)). These strains have been  
76 passaged innumerable times in rodents or culture. This selects for an accelerated growth  
77 rate, which presumably reflect changes in metabolism and cell-cycle regulation. Stumpy  
78 forms are growth-arrested bloodstream forms which are pre-adapted for differentiating into  
79 procyclic forms. Prolonged passage clearly selects for a diminished ability to enter cell-cycle  
80 arrest, and therefore loss of the "stumpy form" life-cycle stage. Since some genes that are  
81 required for survival as procyclic forms are not needed in the bloodstream, prolonged culture  
82 or rodent passage as bloodstream forms can also result in loss of the ability to differentiate  
83 into proliferation-competent procyclic forms. This has, for example, occurred for the Lister  
84 427 bloodstream forms currently used for genetic manipulation. Although several *T. brucei*  
85 strains, including EATRO1125, have been maintained in such a way as to preserve their  
86 differentiation capacity, we do not know whether their differentiation pathways are identical  
87 to those found in natural populations.

88 Another problem is that many cultured cell lines that have the same name have been  
89 maintained for decades in separate labs. As a consequence, the parasites that we study  
90 now are likely to show considerable differences in gene copy numbers, sequence and  
91 regulation compared with their ancestors and also between labs. This will have been  
92 exacerbated by multiple cloning steps that have occurred during the selection of lines  
93 suitable for genetic manipulation. Analysis of gene copy numbers indeed suggested that in  
94 comparison with recently-isolated *T. rhodesiense*, common "lab" strains of *T. brucei* had  
95 varying expansions in multicopy gene arrays encoding proteins required for rapid cell  
96 division, and also differed from each other [12].

97 In this paper we set out to establish new *T. b. brucei* strains that have undergone minimal  
98 passage since field isolation in order to expand the repertoire of trypanosomes available for  
99 lab investigation. We describe the infection and culture characteristics of two new Ugandan  
100 *T. b. brucei* strains that have very different disease profiles in mice. Available stocks of these  
101 parasites have undergone only 3 mouse passages since their isolation from cattle. These  
102 lines should be very useful for analyses of factors governing *T. brucei* disease course, tissue  
103 distribution, and differentiation. In addition, we aimed to find out what happens when *T.*  
104 *brucei* are adapted to bloodstream-form culture. The growth of the new trypanosomes was  
105 slower than of standard lab lines but genome changes were rapid, with gene copy number  
106 changes after only a few weeks.

## 107 **Results and discussion**

### 108 ***In vivo* growth of two new *T. b. brucei* isolates**

109 *T. b. brucei* MAK65 was isolated from a cow in Banya parish, Apac district on Feb 1st, 2016,  
110 while *T. b. brucei* MAK98 was isolated from the same place on July 30th, 2016. The identity  
111 as *T. brucei* was confirmed by the presence of a 480bp band PCR of the rRNA internal  
112 transcribed spacer, and absence of the SRA gene [13]. The strains were shown to be  
113 different by microsatellite typing [14] (S1 text). The frozen cow blood was passaged once  
114 through mice in order to make stabulates for further use.

115 To characterize the two isolates, we first infected 8-week-old swiss mice with 1000 parasites  
116 each. Examples of the parasitaemias are shown in Figure 1A and B. Results suggested that  
117 MAK65 was slightly less virulent than MAK98. We also infected rats with 5000 parasites,  
118 after a single previous mouse passage to avoid artefacts due to differences in stabulate  
119 viability. Parasitaemias were again lower for MAK65. We harvested the parasites 5 or 6 days  
120 after infection (Fig 1C). We had hoped that the populations harvested earlier in infection  
121 would show low expression of stumpy-form markers, and would therefore be suitable for  
122 characterization of long-slender-form transcriptomes. On the contrary, the proportion of  
123 stumpy forms (as judged by PAD1 staining [15]) was highest for MAK65 parasites at low  
124 parasitaemia (Fig 1C, D). Conversely, in the rat with 50-times higher MAK98 parasitaemia,  
125 no stumpy forms were detected (MAK98B) even though cell proliferation had clearly slowed.  
126 These results hint that the two isolates might have differing tendencies to make stumpy

127 forms - or that stumpy forms are preferentially generated in locations other than the blood. A  
128 lower threshold for stumpy formation in MAK65 might explain its lower virulence in mice [16].

129 Transcriptome analysis (E-MTAB-9320, S1 Table) revealed that parasites of the MAK65A  
130 population had highest expression of mRNA encoding the procyclic-form surface protein  
131 GPEET procyclin as well as other procyclic-specific mRNAs such as those encoding trans-  
132 sialidase and enzymes of the citric acid cycle. Interestingly, although culture 98B did not  
133 show PAD1 staining, the population with the lowest expression of stumpy-form markers was  
134 98A. Comparison of the 65A and 98A transcriptomes with those of pure EATRO1125 long  
135 slender and stumpy forms [17] confirmed that MAK65A indeed had a more stumpy-form like  
136 expression pattern than 98A (Figure 1E). Although these were by no means pure  
137 populations, the correlation was better than that obtained for *in vitro* stumpy-form  
138 differentiation of EATRO1125 [18] (S1 Fig. A). We had previously suggested that poly(A)  
139 selection also selects against long mRNAs [19]. Sequencing of mRNA prepared either by  
140 poly(A) selection, or by rRNA depletion (using RNase H and complementary  
141 oligonucleotides) firmly confirmed this (S1 Fig. B).

142 We also sequenced genomic DNA from the two new strains. The initial populations that were  
143 sequenced were MAK65 from rats, and MAK98 cultured for 2 days (see below). We obtained  
144 Oxford nanopore reads (E-MTAB-9318) as well as 72-nt paired-end Illumina reads at over  
145 100-fold coverage (E-MTAB-9759). In combination these might allow *de novo* genome  
146 assembly and should certainly be sufficient to enable assembly based on existing scaffolds.  
147 To minimize manipulation, we did not clone these cells at any stage. Although *T. brucei*  
148 populations are to some extent clonal [20, 21], we cannot rule out the possibility of mixed  
149 infections, and some within-population variation is also to be expected.

#### 150 ***In vitro* growth of the two new *T. b. brucei* isolates**

151 To assess the abilities of the two new strains to grow *in vitro*, we placed trypanosomes  
152 directly from mouse blood stabilates into HMI-9 medium and followed cell numbers, diluting  
153 them regularly to prevent densities did not exceed  $1.5 \times 10^6$ /ml. Both isolates grew rapidly  
154 from stabilate but after 1-2 days, the growth slowed markedly and became intermittent  
155 (Figure 2A-D) with average doubling times of 30-50 hours. This suggests that the parasites  
156 had run out a nutrient that is available only *in vivo*, but were able subsequently to adapt to  
157 growth without it. As expected, there were clear deleterious effects when the density  
158 accidentally exceeded  $2 \times 10^6$ /ml. To find out whether the growth in culture was  
159 reproducible, new stabilates were thawed and placed into culture. The MAK65 cells again  
160 adapted to culture quite readily, with an initial division time of about 17h which shortened to  
161 about 11 h after 5 days (Figure 2E). During culture for a further 2 weeks, growth remained  
162 somewhat erratic, with clear deleterious effects when the density accidentally exceeded  $1.0$   
163  $\times 10^6$ /ml, but the division times progressively decreased to about 7h (S2 Fig. A; cultures  
164 MAK65cA, MAK65cB). Similar observations were made for two additional cultures initiated  
165 from a new stabilate (S2 Fig. B; cultures MAK65cC, MAK65cD).

166 For MAK98, over the first 24h the division time was 8h (Figure 2F; this is the DNA that was  
167 used for genomic sequencing). Cells were then divided into 10 replicate cultures with  
168 different starting densities varying from 6000/ml to  $2 \times 10^5$ /ml. Over the next 24h the division  
169 time was  $17 \pm 3$ h irrespective of the starting density (Figure 2G) and the maximum density  
170 that was subsequently obtained was  $1.5 \times 10^6$ /ml. Several additional attempts to culture  
171 MAK98 from stabilates failed. Although this might be an artefact - a property of the particular  
172 stabilates used - the subsequent slow growth of MAK98 in culture suggests that it is  
173 intrinsically less culture-adaptable, or that perhaps only a small subset of the population is  
174 adaptable. For prolonged growth, we first continued the MAK98 culture shown in Figure 2F,  
175 giving culture MAK98 culture A; this grew erratically with an overall division time of 13h  
176 despite never exceeding densities of  $5 \times 10^5$ /ml (S2 Fig. C). Later, we initiated a new culture  
177 from a frozen stock made from the initial two-day culture; this resulted in culture MAK98  
178 culture B, which after a further week achieved a division time of 11h (S2 Fig. D).

179 Very surprisingly, neither strain survived in medium containing methyl cellulose, which we  
180 use routinely for passage of EATRO1125 bloodstream forms. Results of preliminary  
181 experiments suggested that it was possible to obtain procyclic forms by cultivating the cells  
182 with cis aconitate at 37°C for 24h, then placing them in procyclic-form medium (SDM79) at  
183 27°C, but this has not been investigated in detail.

184 For future genetic manipulation attempts, the MAK65 line appears preferable because it is  
185 uniformly diploid, and appears to be more stable in culture than MAK98.

### 186 ***In vitro* growth affects gene ploidy**

187 To find out how culture affects the genome, we sequenced MAK65 that had been cultured  
188 for 5 weeks (65 culture A, 65 culture B, S1 Fig. A, E-MTAB-10457) and 2 weeks (65 culture  
189 C, 65 culture D, S1 Fig. B, E-MTAB-10457); and MAK98 that had been cultured for 7 weeks  
190 (MAK98 culture A, S1 Fig. C, E-MTAB-10466) and 3 weeks (MAK98 culture B, S1 Fig. D, E-  
191 MTAB-10457).

192 Given the uncloned nature of the starting population we, expected to see selection of  
193 parasites with better abilities to grow in culture, and perhaps of new mutations. Once the  
194 starting genomes have been assembled, it will be possible to do detailed analyses of single  
195 nucleotide polymorphisms that were selected. In the meantime, however, we measured  
196 variations in gene copy number. We had previously found differences in numbers of multi-  
197 copy genes between lab-adapted trypanosomes and *T. b. rhodesiense* isolated from patients  
198 [12, 19], but these analyses were constrained by the limited number of trypanosome  
199 populations available and in particular, the absence of data for un-passaged versions of the  
200 lab-adapted strains. Copy-number calculations were based on the assumption that most  
201 genes are diploid. Only central chromosome regions containing conserved regions were  
202 considered and for multicopy genes, only one representative was considered (S2 Table).

203 First, we re-analysed the genomes of trypanosomes we maintain routinely in the laboratory,  
204 comparing them with the previous previously-characterized *T. b. rhodesiense* strains, and  
205 the reference "genome" strain, TREU927. We analysed data from three long-term-cultured  
206 bloodstream-form lines (two Lister 427, one EATRO1125) and one Lister 427 procyclic-form  
207 culture; all had been cloned at least ten years previously after genetic manipulation, and had  
208 been published intermittently since. All were predominantly diploid. Figure 3 shows the copy  
209 number distribution for the majority of genes - those with 0.5 - 2 copies per haploid genome;  
210 and copy-numbers across the genome are shown in Figure 4. The *T. rhodesiense* genomes  
211 were the most cleanly diploid among this group (Figure 3 and Figure 4F,G). These  
212 trypanosomes were all derived from patients in a single sleeping-sickness focus and had  
213 undergone minimal rodent passage [12]. The "genome" reference strain TREU927 was  
214 initially chosen because the genome size is relatively small relative to other strains, and  
215 because it is differentiation-competent. The source of the DNA for TREU927 sequencing is  
216 not clear from the publication: it may have been derived from procyclic forms that had  
217 recently-differentiated from blood parasites [7], but in that period isolation from rodent blood  
218 was more common. Interestingly, although all TREU927 chromosomes were diploid, the  
219 copy-number distribution was quite broad, suggesting population heterogeneity with low  
220 levels of various gene duplications and deletions (Figure 3, Figure 4A). We discovered that  
221 our EATRO1125 culture is trisomic for small regions of chromosomes 1 and 7, and  
222 monosomic for a small segment for chromosome 11 (Figure 4B). These discrepancies most  
223 likely represent intra-chromosomal duplications and deletions. We were also surprised to  
224 discover that at the time of sequencing, our standard procyclic-form tet-repressor-expressing  
225 Lister 427 line was trisomic for chromosome 6 (Figure 4B). Moreover, the "2T1" Lister 427  
226 line, which contains a "landing pad" that allows targeting of plasmids to a specific rRNA  
227 spacer [22] showed numerous copy-number differences from Lister 427 carrying pHD1313  
228 [23], including a possible trisomy of part of chromosome 5 (Figure 4C). Such partial trisomies  
229 might compromise attempts at homozygous gene deletion. They highlight the fact that

230 strains with the same name, but grown for protracted periods in different laboratories, may  
231 have diverged considerably.

232 We next compared the genomes of the new strains with the previous ones. For both strains,  
233 most genes were clearly diploid (Figure 3, Figure 5 A, B, D and E) except that MAK98 was  
234 triploid for chromosome 5 (Figure B, E). This might be a remnant of mating, but could also  
235 have arisen in the infected cow. It was interesting that the *T. rhodesiense* strains from  
236 human patients showed somewhat more copy-number heterogeneity than the two cattle-  
237 derived *T. brucei*. The difference is unlikely to reflect geographical origin since the *T.*  
238 *rhodesiense* isolates were from Lwala, in Kaberamaido district, which is only about 100 km  
239 from Banya (Apac district) and the dates of isolation were less than 5 years apart. The  
240 difference is also unlikely to have been caused by growth in different hosts since cattle are a  
241 reservoir for *T. rhodesiense*, and *T. rhodesiense* almost certainly undergoes genetic  
242 exchange with *T. brucei* [24].

243 Surprisingly, just a week of culture was sufficient to broaden the ploidy distribution somewhat  
244 for both MAK65 and MAK98 (Figure 5 A, B). This indicates selection of parasite  
245 subpopulations with either deletions, or duplications of different chromosome regions.  
246 Nevertheless, gene copy numbers of all MAK65 cultures looked broadly similar to the source  
247 population; an example is shown in Figure 5D and the remainder are in S3 Fig. One of the  
248 MAK98 cultures - MAK98B - also looked similar to the starting population although some  
249 changes were evident (Figure 5F). In contrast, the MAK98A culture had an exceptionally  
250 broad gene copy-number distribution profile, suggesting that an unusual number of genes  
251 was present in more than 2 copies in the population (Figure 5B). Many small segments had  
252 changed in copy number throughout the genome (Figure 5G), with some chromosome  
253 segments present in triploid, tetraploid or more copies. We do not know whether the  
254 additional gene copies are internal chromosome duplications, or extra small chromosomes.  
255 However this result, combined with the slow growth rate, suggests that while adapting to  
256 culture, the parasites suffered defects in chromosome replication and/or segregation.

### 257 ***In vitro* growth selects for increased copies of a few specific genes**

258 Finally, we looked to see whether there were any consistent changes in copy numbers after  
259 culture adaptation. First, we examined changes that happened in the MAK65 cultures and  
260 MAK98 culture B. (We did not further consider MAK98 culture A because it appeared to be  
261 severely compromised, but calculations are included in S2 Table.) It was immediately clear  
262 that some genes were reproducibly affected. Table 1 is a list of all genes showing an  
263 increase of at least one copy (per diploid genome) in all considered cultures, relative to the  
264 source blood population, and Table 2 shows decreases; examples are also plotted in S3 Fig.  
265 F-H. Increases were seen for histones, several paraflagellar rod proteins, the chaperones  
266 HSP70 (major cytosolic isoform) and mitochondrial HSP60, two mitochondrial RNA editing  
267 proteins and two translation factors, and the cyclin F box proteins CFB1 and CFB2. (These  
268 share sequence; in TREU927 there are actually 5 genes encoding CFB1, followed by only  
269 one encoding CFB2). In contrast, decreases were seen for rRNA genes and PIP39. The  
270 change in rRNA genes is surprising since rRNA is needed for rapid growth, but PIP39  
271 promotes differentiation to stumpy forms [25] so there could be selection for decreased  
272 expression. A detailed alignment of the region that includes *HSP70* is shown in S4 Fig.. It  
273 compares one MAK65 culture (culture A) with the starting population. The *HSP70* gene  
274 (Tb927.11.11330) is arranged as tandem repeats, but is present only once in the reference  
275 genome, because the (approximately 8) repeats were eliminated during genome assembly.  
276 The alignment for the starting population reveals differences between the homologous  
277 chromosomes (changes, relative to 927, seen in only half of the reads) and additional  
278 heterogeneity. Comparing *HSP70* reads with those over the surrounding region, it is clear  
279 that in the culture, amplification occurred within the tandem repeat, without affecting  
280 neighboring genes.

281 If the changes that we saw in MAK65 and MAK98 are important for adaptation to culture,  
282 then they should also be apparent in more established lab strains. S2 Table, sheet 2  
283 includes all genes showing reproducible copy-number changes in culture-adapted parasites  
284 relative to field isolates (see Table Legend for our definition of "reproducible"). The status of  
285 the TREU927 parasites is questionable in the comparisons - they had not been cultured as  
286 bloodstream forms but had undergone at least 40 rodent passages (see  
287 [https://tryps.rockefeller.edu/DocumentsGlobal/lineage\\_TREU927.pdf](https://tryps.rockefeller.edu/DocumentsGlobal/lineage_TREU927.pdf)). In some cases,  
288 genes that appeared to be slightly sub-diploid in the starting populations became slightly  
289 more than diploid in the selected cells; the significance of this is unclear (see Legend to S2  
290 Table), but it could indicate haploidy in a small proportion of cells. Interpretation of the  
291 results is also complicated by the fact that selection for duplication for one gene may well  
292 also affect the surrounding region. Nevertheless, changes in some genes were reproducible.  
293 It is not surprising that tandemly repeated gene arrays were commonly affected, since the  
294 arrangement facilitates recombination; but there was clear specificity because many  
295 repeated genes showed no changes (S2 Table, sheet 3). Most cultures showed increases in  
296 genes encoding histone H3 (Figure 6A) and histone H2A (Figure 6B). Others included AUK2  
297 kinase (Figure 6C), which is involved in DNA repair [26]; marginal increases for PUF9  
298 (Figure 6D), which stabilizes S-phase mRNAs [27]; and a putative monooxygenase (Figure  
299 6E). Most cultures had increases in *HSP70* gene copy numbers (though some reads could  
300 come from homologous genes) (Figure 6F) and the gene encoding the splicing factor TSR1  
301 (Figure 6G) [28]. The numbers of genes encoding CFB1 or CFB2 were also reproducibly  
302 increased (Figure 6H); from the read counts (also of the 3'-untranslated regions) it would  
303 appear that the entire region had been amplified and it is not clear which gene was selected  
304 for. The function of CFB1 is unknown [29], while CFB2 binds to, and stabilizes the mRNA  
305 encoding the variant surface glycoprotein [30]. Gene copy numbers for REC8/SCC1, needed  
306 for sister chromatid adhesion [31]), two flagellar proteins, an RNA polymerase III subunit,  
307 and various other proteins of unknown function were also significantly increased. Among the  
308 few significant decreases were genes encoding a pteridine transporter (Figure 6I) and, rather  
309 oddly, the translation factor eIF3c (Figure 6I). Overall the increases seemed to be biased  
310 towards genes likely to be required for rapid proliferation or stress tolerance.

## 311 **Outlook**

312 Our results show that cultured lines from the same original trypanosome isolate can have  
313 differences in karyotype, and that gene copy numbers and even chromosome ploidies in cell  
314 lines that are in routine use are very likely to differ between labs and clones, even if the  
315 parasites had the same origin. Perhaps we should not be surprised, therefore, if some  
316 results are not consistent between laboratories. It is perhaps also worth checking ploidies  
317 when thinking about gene knock-outs - although Crispr-Cas approaches may to some extent  
318 abrogate that problem.

319 Initial growth of the new parasites in culture was relatively slow, but usually began to speed  
320 up after a few weeks. We do not know what is "missing" from the culture medium, relative to  
321 mammalian blood and tissue fluids. The observed slow proliferation could reflect slow overall  
322 metabolism in all of the parasites, but could also reflect a heterogeneous population, some  
323 growing quite fast, and others dying. The extensive gene copy number changes seen after  
324 only a few weeks of culture adaptation might be adaptive, but could also reflect errors in  
325 DNA replication and chromosome segregation. Our observations on copy number are the tip  
326 of the iceberg: a survey of just a single ~10 kb region revealed selection for smaller  
327 insertions, deletions and point mutations (S4 Fig). More detailed studies of multiple cloned  
328 parasite lines would be necessary to examine this.

329 It was intriguing that the trypanosomes used for TREU927 genome sequencing appeared to  
330 have more genome heterogeneity than either the well-established cultured trypanosomes, or  
331 the field isolates. Perhaps this reflected extensive rodent passage, with different selective  
332 pressures relative to culture? Examination of historical stocks might clarify this. It would also  
333 be really interesting to compare the genome of the original Lister 427 line [32] with those in

334 routine use today. The results clearly raise the question of how much other cultured - or  
335 merely rodent-adapted - organisms differ from their original counterparts, and to what extent  
336 the parasites that are studied in the laboratory are representative of those in the field.

337 We here provide two new *T. brucei* strains for biological studies, with differences in rodent  
338 pathogenicity and the ability to grow in culture. Full genome assembly will enable a much  
339 more thorough comparison between the uncultured and cultured cell populations, as well as  
340 an assessment of the VSG gene repertoires of parasites subject to selection in the field. We  
341 did not clone the isolated parasites, or the cultures, so it would be useful to compare several  
342 cloned lines both genetically and biologically. The very different courses of infection in mice,  
343 as well as differences in the apparent threshold for PAD1 expression, suggest that there  
344 might be differences between MAK65 and MAK98 in tissue distribution. Results so far  
345 suggest that although MAK65 appears to have a lower threshold for stumpy formation in  
346 mice, and is consequently less virulent, it grows more readily in culture and is less prone to  
347 genome changes than MAK98. The MAK65 line would therefore be ideal in order to find out  
348 whether the numerous observations made concerning differentiation of the lab-adapted  
349 EATRO1125 trypanosome line are also valid for trypanosomes that have not undergone  
350 prolonged lab adaptation. Can the new lines make stumpy forms *in vitro*? Can they  
351 differentiate directly from long slender forms? In either case, which signals are important?  
352 Do they require cis-aconitate for differentiation? Do they infect Tsetse more readily than lines  
353 in routine use? How do they respond to stress? Are the tissue distributions different and if  
354 so, how does this impact pathogenicity and differentiation? We hope that labs with  
355 appropriate expertise will investigate these questions.

356

357

## 358 **Materials and Methods**

### 359 **Trypanosome samples and infections**

360 Peripheral blood (3-4ml) from cattle was collected into an EDTA tube (BD Vacutainer). An  
361 aliquot of the whole blood (600µl) was cryopreserved, a drop (10µl) was spotted on  
362 Whatman paper for PCR diagnosis. To determine the genus of the Trypanosome isolates,  
363 PCR was carried out on the Internal transcribed spacer (ITS-1) as described by Njiru et al  
364 2004 [13].

365 To follow mouse infections, a stabilate was thawed and injected into a mouse. Once these  
366 parasitaemias had attained about  $5 \times 10^7$  trypanosomes/ml, 2-week-old inbred Swiss white  
367 mice were infected with 500 parasites each. Parasites were counted by diluting 10µL of tail  
368 blood into 1mL of phosphate-saline-glucose, then counting in a haemocytometer. Thin blood  
369 smears were also prepared for immunofluorescence staining by fixed in methanol and  
370 permeabilizing with 0.2% TritonX-100. Mice were euthanized if obvious terminal symptoms  
371 were observed.

372 For RNA preparation, rats were infected with 5000 parasites each. Parasites were followed  
373 using wet blood films. After the times shown in Figure 1, blood (3-4mL) was collected by  
374 cardiac puncture and approximately 2.5ml drawn into a Paxgene tube. The Paxgene blood  
375 was incubated at room temperature for one hour and thereafter centrifuged at 5000g for  
376 10min. The supernatant was discarded, the pellet washed once with nuclease free water by  
377 centrifuging at 5000g for 10min. The pellet was then resuspended in 1ml of Trifast reagent  
378 (Peqlab, GmbH) and transferred to 1.5ml microfuge tube for RNA preparation.

379 Trypanosomes were cultured as described in [33], starting with frozen mouse blood. PAD1  
380 staining was done at 4°C overnight and DNA was counterstained with DAPI. Stained slides  
381 were blinded and evaluated by an independent observer.



## 382 **Sequence analysis**

383 Ribosomal RNA was depleted from the total RNA by hybridisation with antisense  
384 oligonucleotide and digestion with RNase H as described in [34].  
385 Sequencing of genomic DNA and RNA was done using standard Illumina kits, and some  
386 genomic DNA was also sequenced using an Oxford nanopore device. Reads were aligned to  
387 the genome, then those aligning to open reading frames, annotated 3'-untranslated regions,  
388 and functional non-coding RNAs of the TREU927 genome were counted using the  
389 tryprnaseq [35]. The transcriptome data were analysed using DeSeqU1 [36].  
390 To obtain gene copy numbers, all genomic DNA reads were allowed to align 20 times. We  
391 then selected unique genes, plus, for genes present in more than one copy, only a single  
392 representative copy. We then calculated reads per million per kilobase for this set of open  
393 reading frames. The result was a continuous distribution, with a strong peak. For each  
394 dataset we chose the modal RPKM value to represent a single-copy gene, then adjusted it  
395 slightly to get a symmetrical distribution as shown in S2 Table. We divided the other values  
396 by this to attain gene copy numbers.  
397

## 398 **Data availability**

399 The genome sequences are available with accession numbers E-MTAB-9318 and E-MTAB-  
400 9759 for original strains, and E-MTAB-10457 and E-MTAB-10466 for cultures. The  
401 transcriptome results are deposited as E-MTAB-9320.

402

## 403 **Ethical approval**

404 The sample collection and work with experimental animals was approved by the Makerere  
405 University Animal use committee. The rodent experiment approval is SBLS/HDR/19/012.  
406

## 407 **Acknowledgements**

408 We thank Keith Matthews for antibody to PAD1, and George Cross and Annette McLeod for  
409 useful comments concerning the origin of the TREU927 genome DNA. This work was  
410 partially funded by Deutsche Forschungsgemeinschaft grant number CI112/28-1 to CC and  
411 JM.

412

## 413 **References**

- 414 1. MacLeod A, Tait A, Turner CM. The population genetics of *Trypanosoma brucei* and  
415 the origin of human infectivity. *Philos Trans R Soc Lond B Biol Sci*.  
416 2001;356(1411):1035-44. Epub 2001/08/23. doi: 10.1098/rstb.2001.0892. PubMed  
417 PMID: 11516381; PubMed Central PMCID: PMCPMC1088498.
- 418 2. Sstrom M, Evans B, Benoit J, Balmer O, Aksoy S, Caccone A. De Novo Genome  
419 Assembly Shows Genome Wide Similarity between *Trypanosoma brucei brucei* and  
420 *Trypanosoma brucei rhodesiense*. *PLoS One*. 2016;11(2):e0147660. Epub  
421 2016/02/26. doi: 10.1371/journal.pone.0147660. PubMed PMID: 26910229; PubMed  
422 Central PMCID: PMCPMC4766357.
- 423 3. Peacock L, Ferris V, Sharma R, Sunter J, Bailey M, Carrington M, et al. Identification  
424 of the meiotic life cycle stage of *Trypanosoma brucei* in the tsetse fly. *Proceedings of*  
425 *the National Academy of Sciences of the United States of America*. 2011;108(9):3671-  
426 6. Epub 2011/02/16. doi: 10.1073/pnas.1019423108. PubMed PMID: 21321215;  
427 PubMed Central PMCID: PMCPMC3048101.
- 428 4. Peacock L, Bailey M, Carrington M, Gibson W. Meiosis and Haploid Gametes in the  
429 Pathogen *Trypanosoma brucei*. *Curr Biol*. 2013. Epub 2014/01/07. doi:  
430 10.1016/j.cub.2013.11.044. PubMed PMID: 24388851.

- 431 5. Cross GA, Kim HS, Wickstead B. Capturing the variant surface glycoprotein repertoire  
432 (the VSGnome) of *Trypanosoma brucei* Lister 427. *Molecular and biochemical*  
433 *parasitology*. 2014;195(1):59-73. Epub 2014/07/06. doi:  
434 10.1016/j.molbiopara.2014.06.004. PubMed PMID: 24992042.
- 435 6. Kanmogne GD, Bailey M, Gibson WC. Wide variation in DNA content among isolates  
436 of *Trypanosoma brucei* ssp. *Acta Trop*. 1997;63(2-3):75-87. Epub 1997/02/01. doi:  
437 10.1016/s0001-706x(96)00600-6. PubMed PMID: 9088421.
- 438 7. Melville SE, Leech V, Gerrard CS, Tait A, Blackwell JM. The molecular karyotype of  
439 the megabase chromosomes of *Trypanosoma brucei* and the assignment of  
440 chromosome markers. *Molecular and biochemical parasitology*. 1998;94(2):155-73.  
441 Epub 1998/09/25. doi: 10.1016/s0166-6851(98)00054-1. PubMed PMID: 9747967.
- 442 8. Melville SE, Leech V, Navarro M, Cross GAM. The molecular karyotype of the  
443 megabase chromosomes of *Trypanosoma brucei* stock 427. *Mol Biochem Parasitol*.  
444 2000;111:261-73.
- 445 9. Gibson W, Peacock L, Ferris V, Williams K, Bailey M. Analysis of a cross between  
446 green and red fluorescent trypanosomes. *Biochem Soc Trans*. 2006;34:557-9.
- 447 10. Hope M, MacLeod A, Leech V, Melville S, Sasse J, Tait A, et al. Analysis of ploidy (in  
448 megabase chromosomes) in *Trypanosoma brucei* after genetic exchange. *Mol*  
449 *Biochem Parasitol*. 1999;104(1):1-9. Epub 1999/12/10. doi: 10.1016/s0166-  
450 6851(99)00103-6. PubMed PMID: 10589977.
- 451 11. Gibson W, Garside L, Bailey M. Trisomy and chromosome size changes in hybrid  
452 trypanosomes from a genetic cross between *Trypanosoma brucei rhodesiense* and T.  
453 b. *brucei*. *Mol Biochem Parasitol*. 1992;51(2):189-99. Epub 1992/04/01. doi:  
454 10.1016/0166-6851(92)90069-v. PubMed PMID: 1349422.
- 455 12. Mulindwa J, Mercé C, Matovu E, Enyaru J, Clayton C. Transcriptomes of newly-  
456 isolated *Trypanosoma brucei rhodesiense* reveal hundreds of mRNAs that are co-  
457 regulated with stumpy-form markers. *BMC genomics*. 2015;16:1118. PubMed Central  
458 PMCID: PMC10.1186/s12864-015-2338-y, PMID: 26715446.
- 459 13. Radwanska M, Chamekh M, Vanhamme L, Claes F, Magez S, Magnus E, et al. The  
460 serum resistance-associated gene as a diagnostic tool for the detection of  
461 *Trypanosoma brucei rhodesiense*. *Am J Trop Med Hyg*. 2002;67:684-90.
- 462 14. Kato CD, Alibu VP, Nanteza A, Mugasa CM, Matovu E. Population genetic structure  
463 and temporal stability among *Trypanosoma brucei rhodesiense* isolates in Uganda.  
464 *Parasit Vectors*. 2016;9:259. Epub 2016/05/05. doi: 10.1186/s13071-016-1542-1.  
465 PubMed PMID: 27142001; PubMed Central PMCID: PMCPMC4855840.
- 466 15. Dean S, Marchetti R, Kirk K, Matthews K. A surface transporter family conveys the  
467 trypanosome differentiation signal. *Nature*. 2009;459:213-7.
- 468 16. MacGregor P, Savill NJ, Hall D, Matthews KR. Transmission stages dominate  
469 trypanosome within-host dynamics during chronic infections. *Cell Host Microbe*.  
470 2011;9(4):310-8. Epub 2011/04/20. doi: 10.1016/j.chom.2011.03.013. PubMed PMID:  
471 21501830; PubMed Central PMCID: PMCPMC3094754.
- 472 17. Silvester E, Ivens A, Matthews KR. A gene expression comparison of *Trypanosoma*  
473 *brucei* and *Trypanosoma congolense* in the bloodstream of the mammalian host  
474 reveals species-specific adaptations to density-dependent development. *PLoS*  
475 *neglected tropical diseases*. 2018;12(10):e0006863. Epub 2018/10/12. doi:  
476 10.1371/journal.pntd.0006863. PubMed PMID: 30307943; PubMed Central PMCID:  
477 PMCPMC6199001.
- 478 18. Naguleswaran A, Doiron N, Roditi I. RNA-Seq analysis validates the use of culture-  
479 derived *Trypanosoma brucei* and provides new markers for mammalian and insect life-  
480 cycle stages. *BMC genomics*. 2018;19(1):227. Epub 2018/04/03. doi: 10.1186/s12864-  
481 018-4600-6. PubMed PMID: 29606092; PubMed Central PMCID: PMCPMC5879877.
- 482 19. Mulindwa J, Leiss K, Ibberson D, Kamanyi Marucha K, Helbig C, Melo do Nascimento  
483 L, et al. Transcriptomes of *Trypanosoma brucei rhodesiense* from sleeping sickness  
484 patients, rodents and culture: Effects of strain, growth conditions and RNA preparation  
485 methods. *PLoS neglected tropical diseases*. 2018;12(2):e0006280. Epub 2018/02/24.

- 486 doi: 10.1371/journal.pntd.0006280. PubMed PMID: 29474390; PubMed Central  
487 PMCID: PMCPMC5842037.
- 488 20. Mathieu-Daudé F, Stevens J, Welsh J, Tibayrenc M, McClelland M. Genetic diversity  
489 and population structure of *Trypanosoma brucei*: clonality versus sexuality. Mol  
490 Biochem Parasitol. 1995;72(1-2):89-101. Epub 1995/06/01. doi: 10.1016/0166-  
491 6851(95)00083-d. PubMed PMID: 8538703.
- 492 21. Duffy CW, MacLean L, Sweeney L, Cooper A, Turner CM, Tait A, et al. Population  
493 genetics of *Trypanosoma brucei rhodesiense*: clonality and diversity within and  
494 between foci. PLoS Negl Trop Dis. 2013;7(11):e2526. Epub 2013/11/19. doi:  
495 10.1371/journal.pntd.0002526. PubMed PMID: 24244771; PubMed Central PMCID:  
496 PMCPMC3828156.
- 497 22. Alsford S, Horn D. Single-locus targeting constructs for reliable regulated RNAi and  
498 transgene expression in *Trypanosoma brucei*. Molecular and biochemical parasitology.  
499 2008;161:76-9.
- 500 23. Alibu VP, Storm L, Haile S, Clayton C, Horn D. A doubly inducible system for RNA  
501 interference and rapid RNAi plasmid construction in *Trypanosoma brucei*. Mol  
502 Biochem Parasitol. 2004;139:75-82.
- 503 24. Balmer O, Beadell JS, Gibson W, Caccone A. Phylogeography and taxonomy of  
504 *Trypanosoma brucei*. PLoS Negl Trop Dis. 2011;5(2):e961. Epub 2011/02/25. doi:  
505 10.1371/journal.pntd.0000961. PubMed PMID: 21347445; PubMed Central PMCID:  
506 PMCPMC3035665.
- 507 25. Szoor B, Ruberto I, Burchmore R, Matthews KR. A novel phosphatase cascade  
508 regulates differentiation in *Trypanosoma brucei* via a glycosomal signaling pathway.  
509 Genes Dev. 2010;24(12):1306-16. Epub 2010/06/17. doi: 10.1101/gad.570310.  
510 PubMed PMID: 20551176; PubMed Central PMCID: PMC20551176.
- 511 26. Stortz JA, Serafim TD, Alsford S, Wilkes J, Fernandez-Cortes F, Hamilton G, et al.  
512 Genome-wide and protein kinase-focused RNAi screens reveal conserved and novel  
513 damage response pathways in *Trypanosoma brucei*. PLoS pathogens.  
514 2017;13(7):e1006477. Epub 2017/07/26. doi: 10.1371/journal.ppat.1006477. PubMed  
515 PMID: 28742144.
- 516 27. Archer SK, van Luu D, de Queiroz R, Brems S, Clayton CE. *Trypanosoma brucei*  
517 PUF9 regulates mRNAs for proteins involved in replicative processes over the cell  
518 cycle. PLoS Pathog. 2009;5:e1000565. doi: 10.1371/journal.ppat.1000565.
- 519 28. Gupta SK, Chikne V, Eliaz D, Tkacz ID, Naboishchikov I, Carmi S, et al. Two splicing  
520 factors carrying serine-arginine motifs, TSR1 and TSR1IP, regulate splicing, mRNA  
521 stability, and rRNA processing in *Trypanosoma brucei*. RNA biology. 2014;11(6). Epub  
522 2014/06/13. PubMed Central PMCID: PMC24922194.
- 523 29. Benz C, Clayton C. The cyclin F box protein CFB2 is required for cytokinesis of  
524 bloodstream-form *Trypanosoma brucei*. Molecular and biochemical parasitology.  
525 2007;156:217-24.
- 526 30. Melo do Nascimento L, Egler F, Arnold K, Papavisiliou N, Clayton C, Erben E.  
527 Functional insights from a surface antigen mRNA-bound proteome. eLife.  
528 2021;10:e68136. doi: <https://doi.org/10.7554/eLife.68136>.
- 529 31. Gluenz E, Sharma R, Carrington M, Gull K. Functional characterization of cohesin  
530 subunit SCC1 in *Trypanosoma brucei* and dissection of mutant phenotypes in two life  
531 cycle stages. Molecular microbiology. 2008;69(3):666-80. Epub 2008/06/17. doi:  
532 10.1111/j.1365-2958.2008.06320.x. PubMed PMID: 18554326; PubMed Central  
533 PMCID: PMCPMC2610385.
- 534 32. Peacock L, Ferris V, Bailey M, Gibson W. Fly transmission and mating of  
535 *Trypanosoma brucei brucei* strain 427. Molecular and biochemical parasitology.  
536 2008;160(2):100-6. Epub 2008/06/06. doi: 10.1016/j.molbiopara.2008.04.009. PubMed  
537 PMID: 18524395; PubMed Central PMCID: PMCPMC2442871.
- 538 33. Fadda A, Ryten M, Droll D, Rojas F, Färber V, Haanstra J, et al. Transcriptome-wide  
539 analysis of mRNA decay reveals complex degradation kinetics and suggests a role for

- 540 co-transcriptional degradation in determining mRNA levels. *Molecular microbiology*.  
541 2014;94:307-26. doi: 10.1111/mmi.12764. PubMed Central PMCID: PMCdoi: .
- 542 34. Minia I, Merce C, Terrao M, Clayton C. Translation regulation and RNA granule  
543 formation after heat shock of procyclic form *Trypanosoma brucei*: many heat-induced  
544 mRNAs are increased during differentiation to mammalian-infective forms. *PLoS*  
545 *neglected tropical diseases*. 2016;10:e0004982. PubMed Central PMCID:  
546 PMC10.1371/journal.pntd.0004982.
- 547 35. Leiss K, Merce C, Muchunga E, Clayton C. TrypRNAseq - A easy to use pipeline for  
548 *Trypanosoma* RNAseq data. Zenodo. 2016;<http://doi.org/10.5281/zenodo.158920>.
- 549 36. Leiss K, Clayton C. DESeqUI - Trypanosome RNAseq analysis made easy. Zenodo.  
550 2016;doi:10.5281/zenodo.165132.
- 551 37. Wirtz E, Leal S, Ochatt C, Cross GA. A tightly regulated inducible expression system  
552 for conditional gene knock-outs and dominant-negative genetics in *Trypanosoma*  
553 *brucei*. *Molecular and biochemical parasitology*. 1999;99(1):89-101. Epub 1999/04/24.  
554 doi: 10.1016/s0166-6851(99)00002-x. PubMed PMID: 10215027.  
555  
556

557 **Tables**

558  
559  
560  
561

**Table 1.** Genes showing copy number increases after culture of MAK65 and MAK98 *T. brucei*. Diploid gene copy numbers are shown. The haploid version is in Supplementary Table S2, sheet 1.

| GeneID   | Annotation                              | Class            | MAK 65 | MAK 98 | MAK 65 culture A | MAK 65 culture B | MAK 65 culture C | MAK 65 culture D | MAK 98 culture B | Average change |
|----------|-----------------------------------------|------------------|--------|--------|------------------|------------------|------------------|------------------|------------------|----------------|
| 11.11330 | heat shock protein 70                   | Chaperone        | 18.3   | 20.3   | 23.6             | 25               | 26.6             | 25.1             | 26.9             | +6.8           |
| 7.2820   | histone H2A                             | Chromatin        | 46.4   | 43.2   | 51.7             | 54               | 56.5             | 54.5             | 55.6             | +8.8           |
| 1.2430   | histone H3                              | Chromatin        | 37.6   | 26.5   | 55               | 58.5             | 61.3             | 57.9             | 31.2             | +17.4          |
| 5.4170   | histone H4                              | Chromatin        | 42.3   | 63.4   | 49.4             | 49.6             | 51.5             | 50.6             | 70.5             | +7.8           |
| 3.4290   | paraflagellar rod protein PFR1          | Cytoskeleton     | 9.7    | 10.5   | 12               | 12.9             | 13.3             | 13               | 13.1             | +3             |
| 3.3770   | paraflagellar rod protein PFC6          | Cytoskeleton     | 3.9    | 4.2    | 5                | 5.2              | 5.7              | 5.2              | 5.6              | +1.4           |
| 8.4970   | paraflagellar rod protein PFR2          | Cytoskeleton     | 7.5    | 7.9    | 8.9              | 9                | 9.4              | 8.9              | 9.3              | +1.6           |
| 9.12550  | glycosomal glycerol kinase GLK1         | Glucose-glycerol | 8.6    | 10.8   | 10.9             | 11.5             | 11.9             | 11.8             | 15.2             | +3.2           |
| 8.1620   | MSP-B, putative                         | Membrane protein | 9.4    | 14.3   | 14               | 14.1             | 14.7             | 14.4             | 15.4             | +4.2           |
| 11.15490 | Tb-291 membrane protein                 | Membrane protein | 6.3    | 6      | 9                | 9.5              | 10.6             | 9.4              | 9.1              | +3.2           |
| 10.6510  | mitochondrial HSP60                     | Mito.bio-genesis | 5.5    | 5.9    | 6.9              | 7.4              | 7.8              | 7.4              | 7.8              | +1.8           |
| 8.7260   | kinetoplast-associated protein          | Mito.DNA         | 4.3    | 3.1    | 6                | 6.6              | 7.3              | 6.1              | 4.5              | +2             |
| 11.9570  | hypothetical protein                    | Mito.pathway     | 2.8    | 5.2    | 6.2              | 6.6              | 6.7              | 6.4              | 6.6              | +3.2           |
| 10.9720  | RNA-editing protein REAP-1              | Mito.RNA         | 3.2    | 6.7    | 5.2              | 5.5              | 5.5              | 5.7              | 8.8              | +2.2           |
| 6.2230   | TbRGG1                                  | Mito.RNA         | 3      | 3.2    | 4.2              | 4.5              | 4.9              | 4.6              | 5                | +1.6           |
| 10.2110  | EF1-alpha                               | Translation      | 20.8   | 22.4   | 27               | 28.9             | 30.8             | 28.5             | 31.5             | +8.2           |
| 10.4570  | EF2                                     | Translation      | 5.5    | 6.6    | 7.9              | 8.2              | 8.5              | 8.1              | 8.7              | +2.6           |
| 1.4540   | cyclin-like F-box protein CFB1          | Ubiquitin        | 15.3   | 14.9   | 19.3             | 20.7             | 21.3             | 21               | 20.1             | +5.2           |
| 1.4650   | cyclin-like F-box protein CFB2          | Ubiquitin        | 6.4    | 6.6    | 7.8              | 7.9              | 8.1              | 8.3              | 8                | +1.6           |
| 5.1780   | hypothetical protein, conserved         | Unknown          | 3.6    | 5.7    | 4.6              | 4.7              | 5                | 4.9              | 7.9              | +1.4           |
| 3.4740   | glycerol-3-phosphate dehydrogenase-like | Unknown          | 3.5    | 3.8    | 4.9              | 5.1              | 5.8              | 5.4              | 5.7              | +1.8           |
| 4.3580   | Domain found in a transcription factor  | Unknown          | 4.6    | 4.9    | 5.8              | 5.8              | 6.1              | 5.7              | 6.3              | +1.2           |

562  
563

564  
565  
566  
567

**Table 2.**

Genes showing copy number decreases after culture of MAK65 and MAK98 *T. brucei*. Diploid gene copy numbers are shown. The haploid version is in Supplementary Table S2, sheet 1.

| GeneID   | Annotation                                 | Class                | MAK 65 | MAK 98 | MAK 65 culture A | MAK 65 culture B | MAK 65 culture C | MAK 65 culture D | MAK 98 culture B | Average change |
|----------|--------------------------------------------|----------------------|--------|--------|------------------|------------------|------------------|------------------|------------------|----------------|
| 8.4700   | AAT5 Arginine transporter                  | Amino acid transport | 14.8   | 10.6   | 12.1             | 11.4             | 11.6             | 11.9             | 9.3              | -2.6           |
| 11.13020 | calmodulin                                 | Calcium              | 10     | 9.3    | 8                | 8                | 8.3              | 8.8              | 7.6              | -1.6           |
| 11.7740  | dynein light chain                         | Cytoskeleton         | 7.3    | 7.4    | 4.3              | 3.8              | 3.8              | 4.4              | 5.6              | -3             |
| 9.13820  | KMP-11                                     | Cytoskeleton         | 8.8    | 8.3    | 7.3              | 6.5              | 6.6              | 6.9              | 6.6              | -2             |
| 11.8680  | DNA polymerase kappa                       | DNA                  | 11     | 12.4   | 9.9              | 9.5              | 9.4              | 9.7              | 10.4             | -1.4           |
| 9.6090   | PTP1-interacting protein PIP39             | Protein phosphatase  | 30.5   | 15.9   | 28.2             | 26.5             | 27               | 27.9             | 14.8             | -2.8           |
| 10.8300  | U1A small nuclear ribonucleoprotein RBP14A | RNA processing       | 4.2    | 4.5    | 2.7              | 2.6              | 2.5              | 2.6              | 3.4              | -1.6           |
| 11.18680 | dynein light chain LC8 DYNLL1              | RNA synthesis        | 4.7    | 4.6    | 3.2              | 3.2              | 2.9              | 3.3              | 3.1              | -1.6           |
| 2.1931   | 18S ribosomal RNA                          | rRNA                 | 24.1   | 23.5   | 18.8             | 18.2             | 18.1             | 18               | 22.1             | -5             |
| 3.3441   | 28S alpha ribosomal RNA                    | rRNA                 | 28.6   | 30     | 22.5             | 21.1             | 20.9             | 20.9             | 25.7             | -6.6           |
| 7.6885   | 28S beta ribosomal RNA                     | rRNA                 | 28.6   | 32.1   | 25.2             | 24.2             | 23.7             | 23.9             | 28.5             | -4.2           |
| 3.3431   | 5.8S ribosomal RNA                         | rRNA                 | 42.3   | 38.8   | 25.4             | 22.8             | 22.5             | 24.9             | 28.2             | -16.8          |
| 9.2840   | Fam77 cell surface phylome protein         | Unknown              | 13.9   | 12.7   | 12.4             | 10.9             | 10.7             | 11.7             | 9.5              | -2.6           |
| 1.40     | hypothetical protein                       | Unknown              | 8.3    | 11.3   | 4.9              | 4.1              | 4                | 4.7              | 8.1              | -3.8           |
| 5.297b   | hypothetical protein                       | Unknown              | 14     | 14.2   | 10.4             | 9.5              | 9.4              | 10               | 11.9             | -3.8           |
| 10.130   | hypothetical protein                       | Unknown              | 7.8    | 7.4    | 4.4              | 3.8              | 4                | 4.3              | 5.5              | -3.4           |
| 5.293b   | hypothetical protein                       | Unknown              | 10.6   | 11.1   | 7.6              | 7.2              | 6.9              | 7.4              | 9.2              | -3             |

568  
569  
570

571 **Legends**

572 **Figure 1**

573 Growth of MAK65 and MAK98 strains in rodents.

574 A. Parasitaemias after infection of 3 mice with 1000 strain MAK65 parasites. "d" indicates  
 575 death and "k" indicates killing because of clear symptoms. The y axis scale indicates the  
 576 number by which the parasite concentrations were multiplied to obtain the scale. Thus  
 577 "100" indicates  $10^8$ .

578 B. Parasitaemias after infection of 3 mice with 1000 strain MAK98 parasites.

579 C. Growth of both strains in rats before harvest for RNA purification. The percentage of  
 580 PAD1 positive cells at the time of harvest is indicated.

581 D. Example of PAD1 staining for sample 65A.

582 E. The transcriptomes of population 65A and 98A parasites (panel C) were compared and  
 583 the log2 ratio (65A/98A, Supplementary Table S1, sheet 1) is on the y-axis. The x-axis shows  
 584 published stumpy/long slender results for trypanosomes grown in mice [17].  
 585

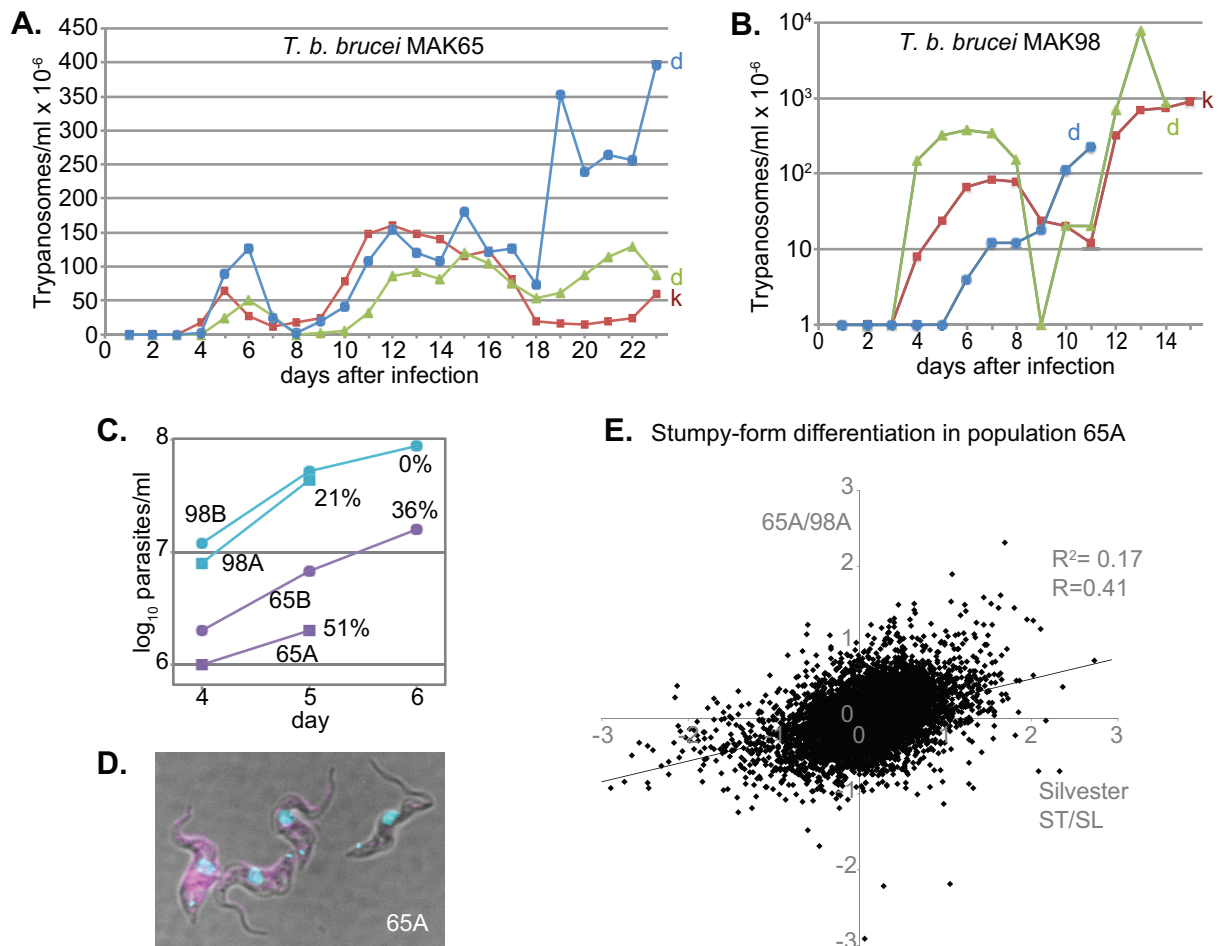

586  
 587  
 588

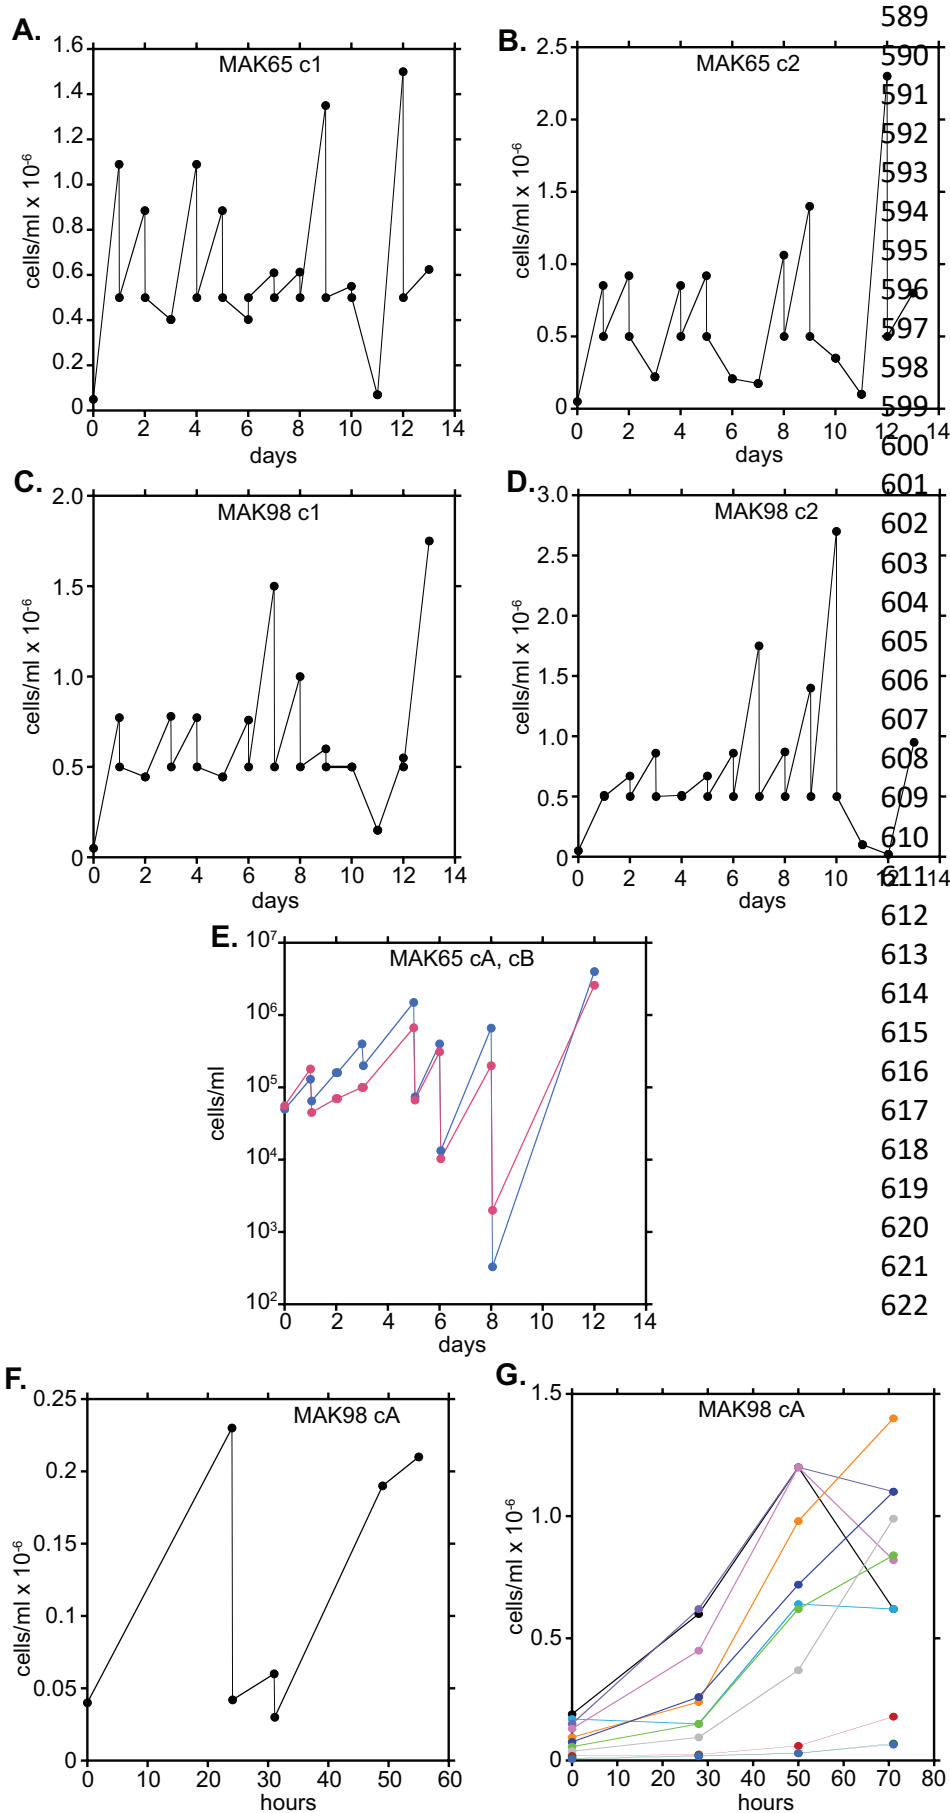

**Figure 2.** Parasite densities in cultures from blood of mice infected with MAK65 or MAK98. A, B: cultures from MAK65; C, D: cultures from MAK98; E: MAK65 cultures that were continued for DNA preparation (cultures A and B); F: MAK98 culture used both for "original strain" DNA preparation and for prolonged culture (cultures MAK98 A and B). G: MAK98 cultures initiated at different densities in order to determine the maximal cell density.

589  
590  
591  
592  
593  
594  
595  
596  
597  
598  
599  
600  
601  
602  
603  
604  
605  
606  
607  
608  
609  
610  
611  
612  
613  
614  
615  
616  
617  
618  
619  
620  
621  
622



623 **Figure 3.**

624 Copy number distributions for different trypanosome strains and cultures.

625 After genome sequencing all reads were allowed to align 20 times. For a set of unique  
626 genes, containing one representative each for repeated genes, reads per million reads were  
627 calculated. Copy numbers for each gene were then calculated based on the assumption that  
628 most genes are present once in every haploid genome (or 2 per diploid genome). The  
629 numbers of genes with copy numbers between 1 and 4 are plotted here for the strains and  
630 cultures indicated.

631

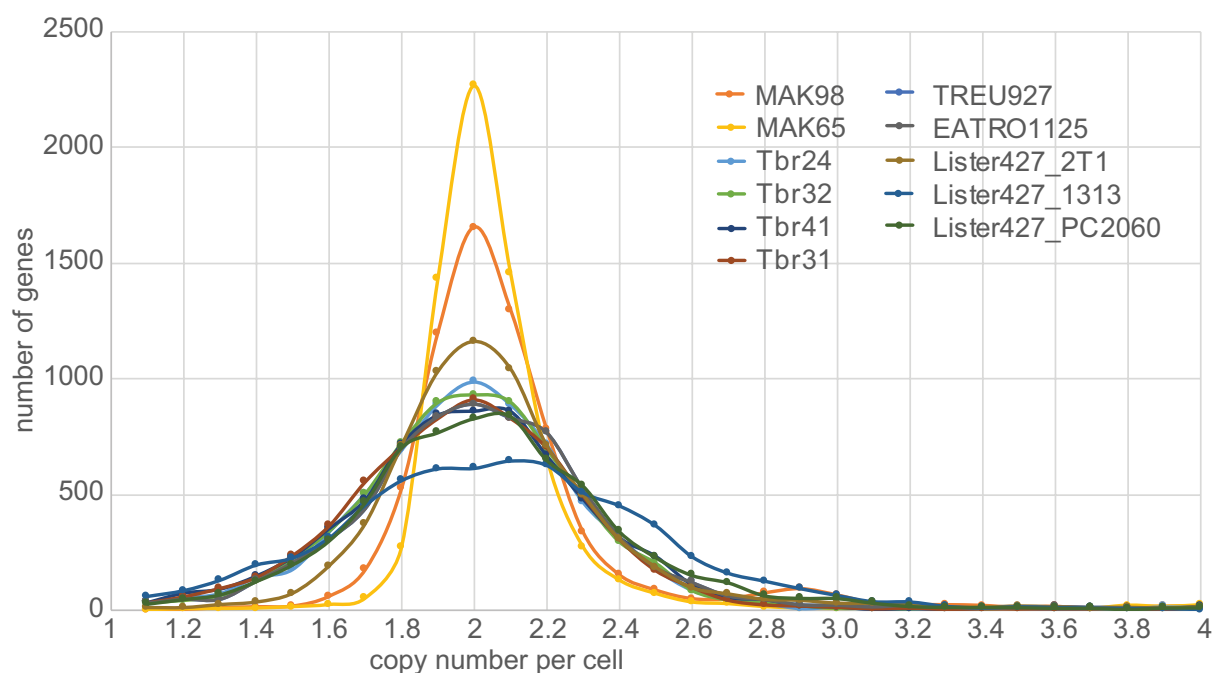

632  
633

634 **Figure 4.**

635 Gene copy numbers of older lines plotted across the genome.

636 Copy numbers were determined as in Figure 3. The approximate chromosome boundaries

637 are indicated on the plot; columns exceeding 8 copies are runcated at the top of each panel.

638 Red bars indicate departures from diploidy. The strain or culture is indicated on each panel.

639 A: TREU927 (genome strain); B: Cultured EATRO1125 bloodstream forms expressing the tet

640 repressor; C: Lister 427 2T1 bloodstream forms expressing the tet repressor and T7

641 polymerase (427\_2T1) [37]; D: Lister 427 bloodstream forms expressing the tet repressor

642 (427\_1313) [23]; E: Lister 427 procyclic forms (427\_PC2060) expressing the tet repressor;

643 F, G: *T. b. rhodesiense* from humans, passaged 3 times in rodents [12].

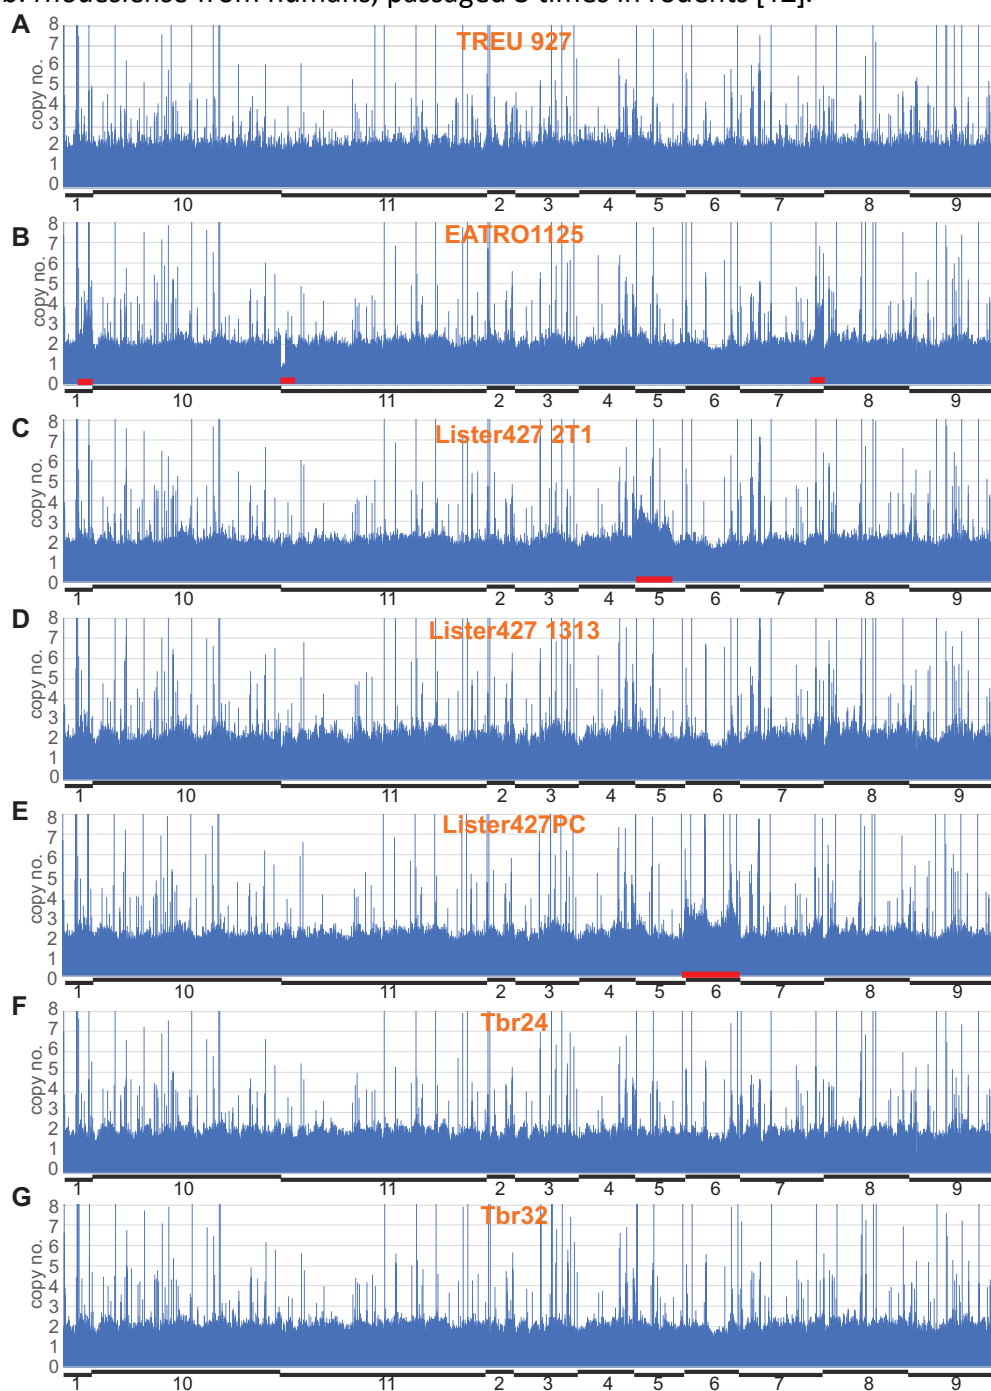

644

645

646

647 **Figure 5.**

648 Gene copy numbers for original and cultured MAK65 and MAK98

649 A. Copy numbers for original and cultured MAK65, as in Figure 3.

650 B. Copy numbers for original and cultured MAK98, as in Figure 3.

651 C - G: Copy numbers plotted across the genome, as in Figure 4. The courses of the cultures

652 are shown in supplementary Figure 2.

653

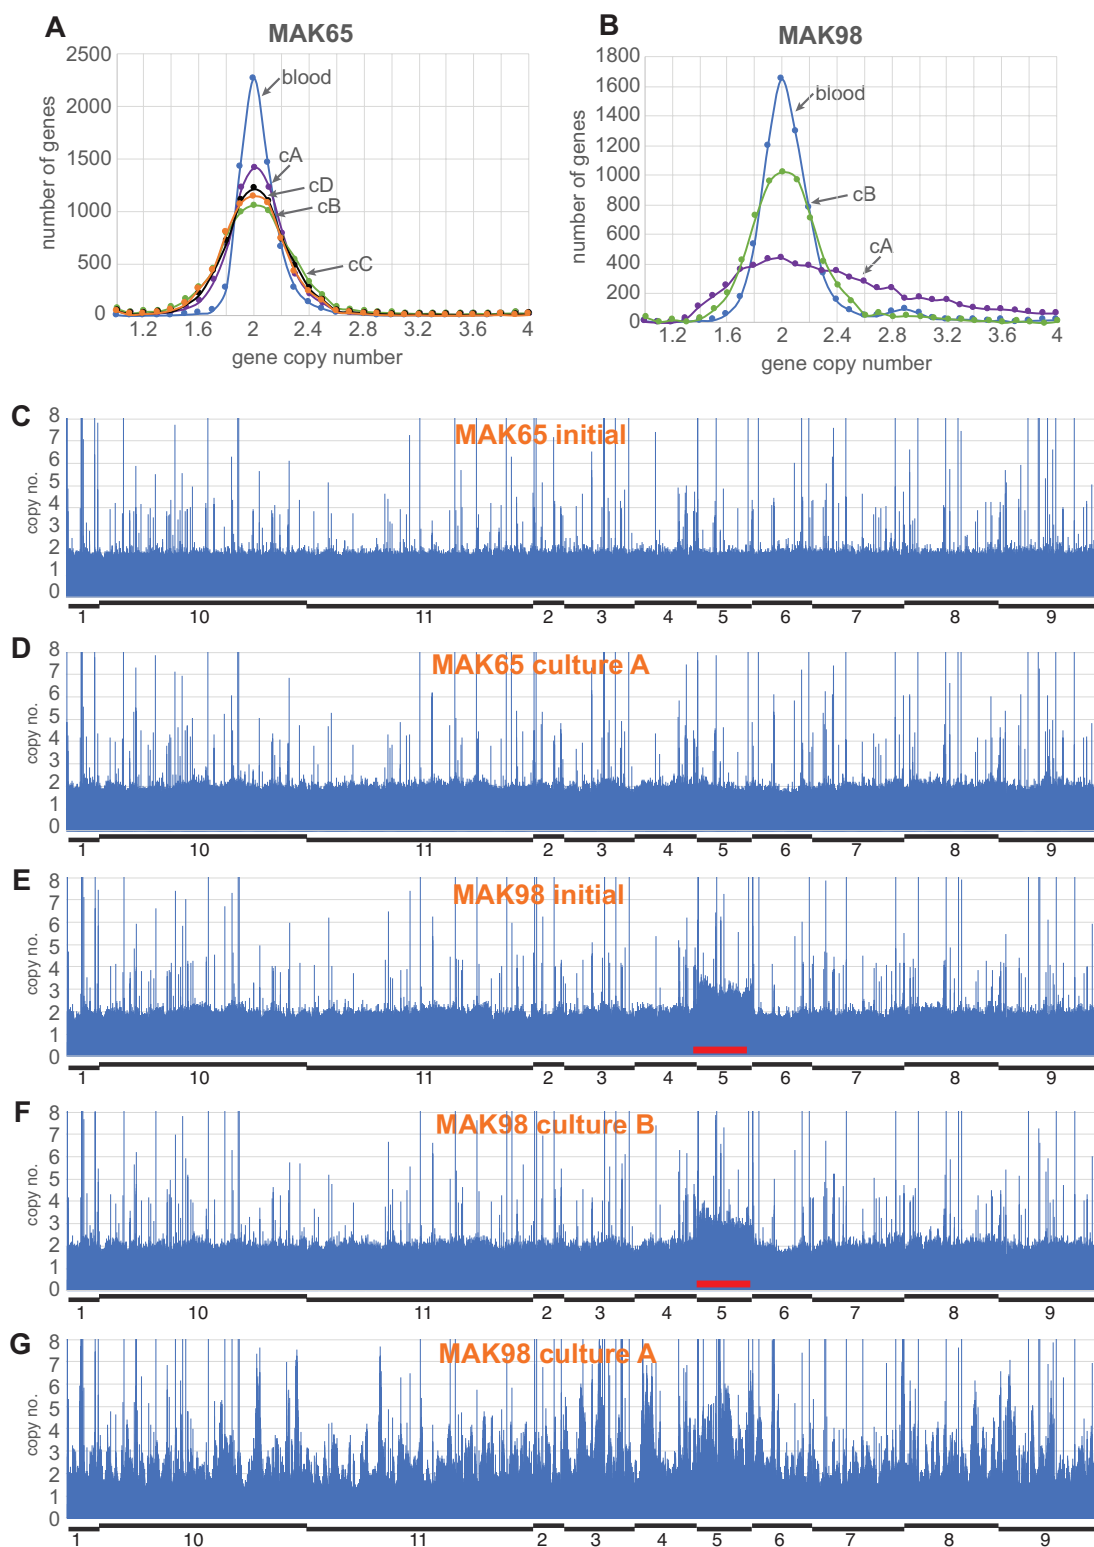

654  
655

656 **Figure 6.**

657 Copy numbers of selected genes that appear to be influenced by culture. The gene products  
 658 and numbers are shown above each graph. Columns with green underlay are for non-  
 659 culture-selected parasites, and those with blue underlay were culture-selected. Colours  
 660 indicate the origin. The four *T. b. rhodesiense* isolates (Tbr) are from independent patients  
 661 but have been assigned the same colour because they were all taken from a single clinic.  
 662 The same colours are used in Supplementary table 2.

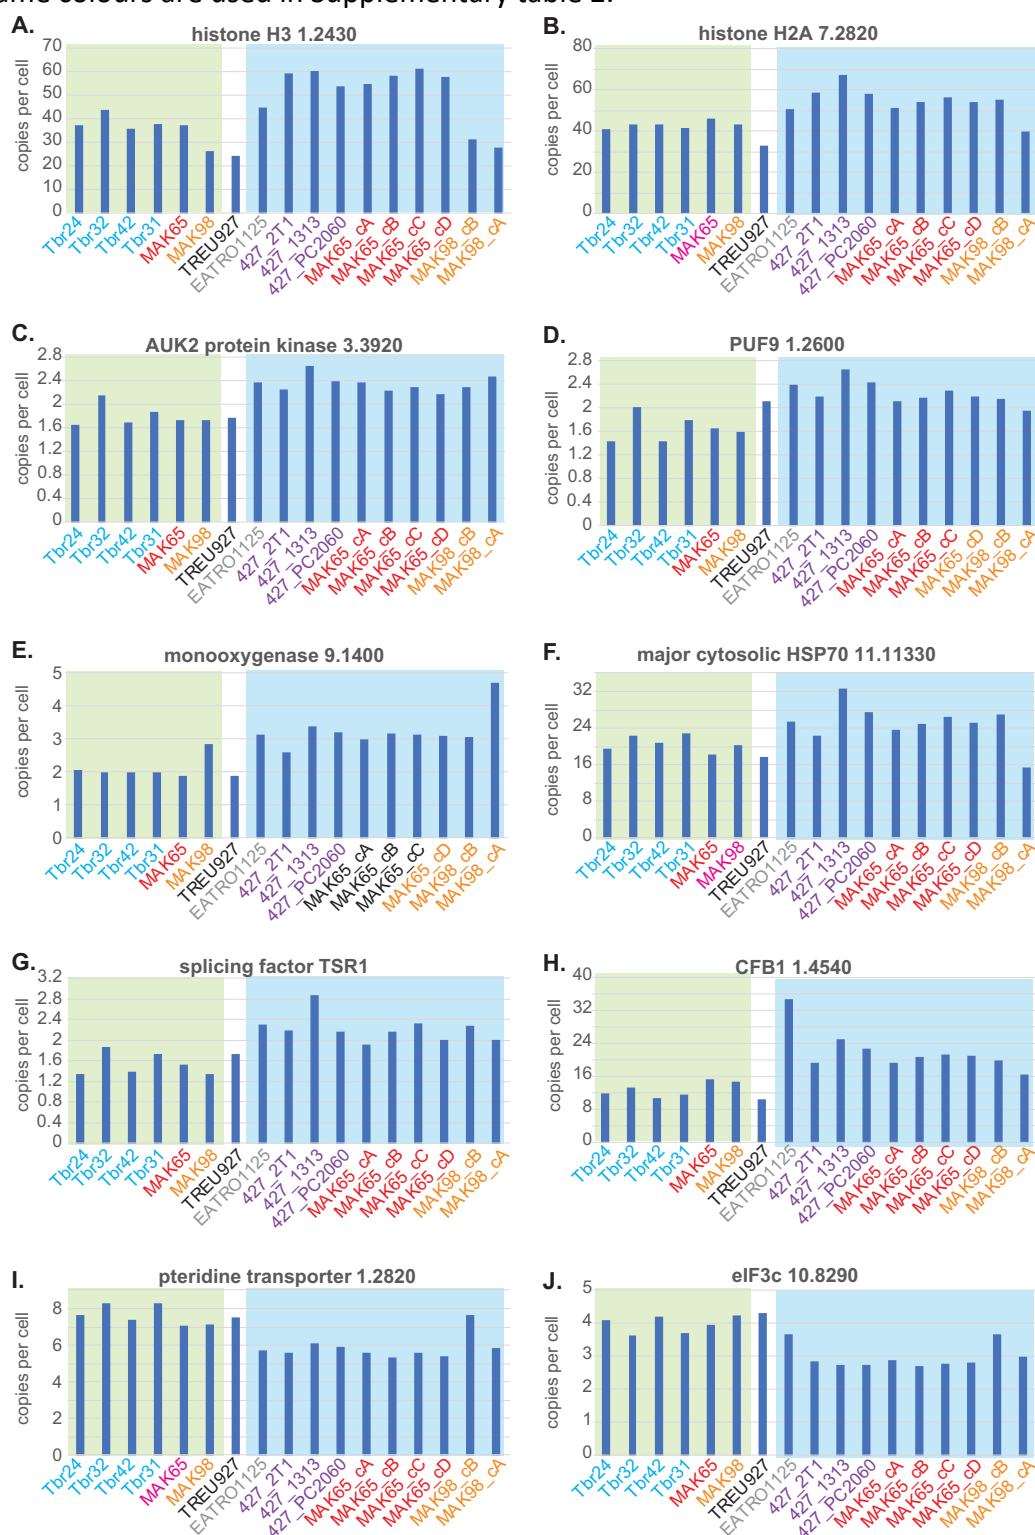

663  
 664

665  
666  
667  
668  
669

## **Supplements**

### **670 Supplementary text 1: Preliminary characterization**

#### **671 1. *T. brucei* isolates from cattle grown in mice**

672 We inoculated and successfully grew 3 recently isolated *Trypanosoma brucei brucei* strains  
673 from cattle (Table 1) and made fresh stabilates.

674 **Table 1**

| Isolate ID | Simplified name | Source Village/Parish | Source District | Date of Isolation |
|------------|-----------------|-----------------------|-----------------|-------------------|
| Tb065BAPC  | MAK65           | Bunya                 | Apac            | 25/5/2016         |
| Tb236BAPC  |                 | Bunya                 | Apac            | 25/5/2016         |
| Tb098AAPC  | MAK98           | Apuru                 | Apac            | 30/7/2017         |

675

676 For simplicity Tb065BAPC and Tb098AAPC are designated MAK65 and MAK98 in the  
677 paper, emphasizing their original characterization at Makerere University.

#### **678 2. PCR characterization**

##### *679 Internal transcribed spacer (ITS)*

680 We confirmed *Trypanozoon* status in all isolates by carrying out internal transcribed space  
681 (ITS) PCR, which yields a band size of approximately 480bp. We confirmed that the  
682 parasites were *T. brucei brucei*, and therefore not infective for humans, by PCR for the SRA  
683 gene [1]. Human-infective *T. brucei rhodesiense* yield a product of 284bp. In both cases *T. b.*  
684 *rhodesiense* LW042 [2] was used as a positive control.

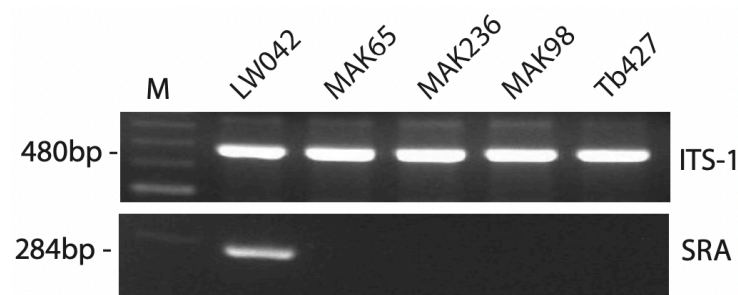

685

686 Figure 1: PCR confirmation that MAK65 and MAK98 are *T. brucei brucei*: positive PCR for  
687 ITS-1 and negative result for SRA.

##### *688 Microsatellites*

689 Genotyping of the *T. brucei* strains was carried out using microsatellites designated for *T.*  
690 *brucei* (Table 1) as described in [3].

691 The three recently isolated strains were again compared with *T. b. rhodesiense* human  
692 isolate LW042 (Figure 2). Tb236B and MAK65 were similar and could be distinguished from  
693 both MAK98 and LW042. This was probably because Tb236B and MAK65 were isolated  
694 from cattle in the same village/parish.

695

696 Figure 2: Microsatellite analysis.

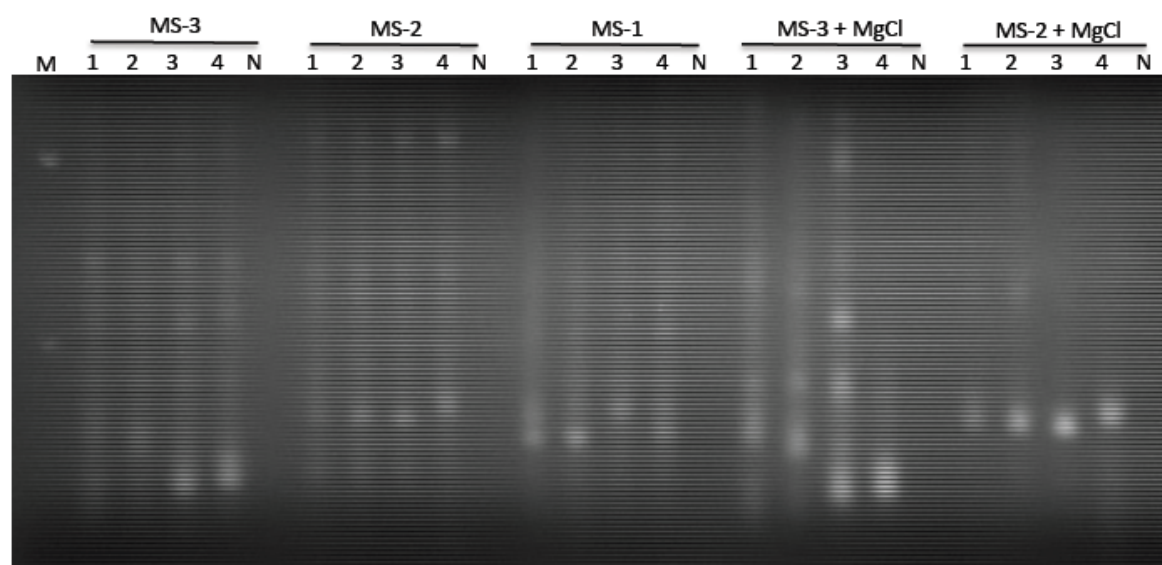

697

698 Microsatellite analysis of 1-Tb236B, 2-Tb065B, 3-LW042, 4-Tb098A using the primers  
699 shown in Table 2.

700 **Table 2**

| Locus (code)      | Primer (outer)       | Sequence (5'-3')                                      | Primer (nested)      | Sequence (5'-3')                                      |
|-------------------|----------------------|-------------------------------------------------------|----------------------|-------------------------------------------------------|
| Ch2/PLC (MS-1)    | PLC-G2<br>PLC-H4     | ttaagtggacgacgaaataacaaca<br>tcaaacaccgtccccctcaataat | 2/PLC-G<br>2/PLC-H3  | caacgacgttgaagagtgtgaac<br>ccactgaccttcatttgatcgcttc  |
| Ch4/M12C12 (MS-2) | M12C12-C<br>M12C12-B | aaacctcatccagtcgactgg<br>taccctcatcaagtggctg          | M12C12-A<br>M12C12-D | tggacacacagaagcctaccg<br>agtgtggtggtgctgcaaacctgg     |
| Ch5/JS2 (MS-3)    | JS2-C<br>JS2-D       | agtaatgggaatgagcgtcaccag<br>gatcttcgcttacacaagcggtag  | JS2-AFAM<br>JS2-B    | gattggcgcaacaacttcacatacg<br>ctttctcctggcattgtttactat |

701

702

703

- 704 1. Radwanska M, Chamekh M, Vanhamme L, Claes F, Magez S, Magnus E, et al. The  
705 serum resistance-associated gene as a diagnostic tool for the detection of *Trypanosoma*  
706 *brucei rhodesiense*. Am J Trop Med Hyg. 2002;67:684-90.
- 707 2. Mulindwa J, Mercé C, Matovu E, Enyaru J, Clayton C. Transcriptomes of newly-  
708 isolated *Trypanosoma brucei rhodesiense* reveal hundreds of mRNAs that are co-regulated  
709 with stumpy-form markers. BMC genomics. 2015;16:1118. PubMed Central PMCID:  
710 PMC10.1186/s12864-015-2338-y, PMID: 26715446.
- 711 3. Kato CD, Alibu VP, Nanteza A, Mugasa CM, Matovu E. Population genetic structure  
712 and temporal stability among *Trypanosoma brucei rhodesiense* isolates in Uganda. Parasit  
713 Vectors. 2016;9:259. Epub 2016/05/05. doi: 10.1186/s13071-016-1542-1. PubMed PMID:  
714 27142001; PubMed Central PMCID: PMC4855840.

715

716

717

718 **S1 Figure**

719 Transcriptome comparisons.

720 A. Comparison of published results for *in vitro* [18] and *in vivo* [17]. In each case the  $\log_2$   
721 ratio of stumpy-form to long-slender form EATRO125 is shown.

722 B. Total RNA from MAK98 trypanosomes (sample A) was either selected on oligo d(T) to give  
723 poly(A)+ RNA, or treated with RNase H and oligonucleotides complementary to the rRNA in  
724 order to give ribo-minus RNA. The  $\log_2$  ratio of poly(A)+ to ribo-minus was is on the y-axis  
725 and the annotated mRNA length (log scale) on the x-axis. Results are in Supplementary table  
726 S1, sheets 2 and 5.

**A.** Stumpy-form differentiation *in vitro* vs *in vivo*

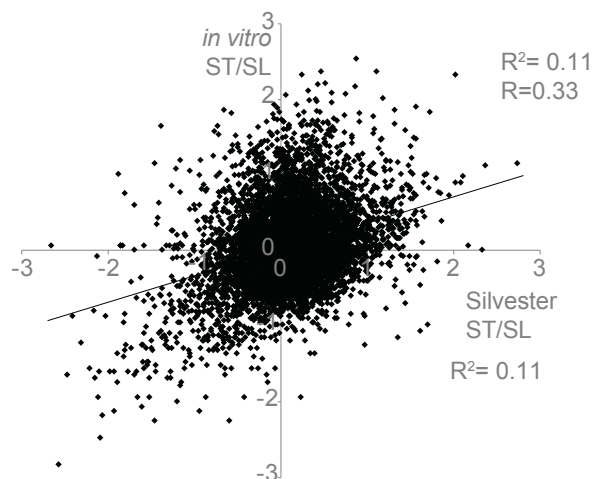

**B.** Poly(A) selection depletes long mRNAs

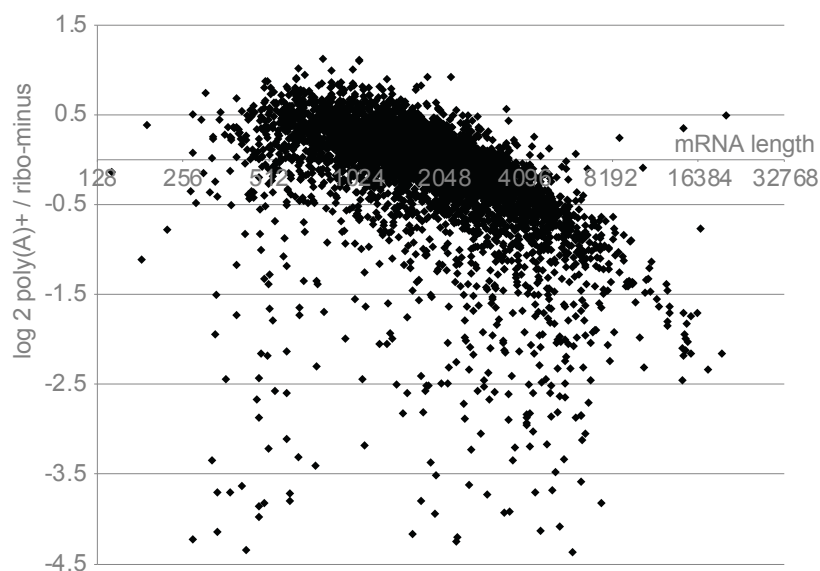

727  
728  
729  
730

731 **S2 Figure**

732 Cultures of MAK65 and MAK98 used for genome sequencing.

733 In each case the upper panel shows parasite densities on a linear scale and the lower panel  
734 shows cumulative parasite numbers on a log scale. The lines on the log scale graphs indicate  
735 the part used for division time calculations. In each case DNA was harvested at the end of  
736 the culture period, and stabilates were made.

737 A. MAK65 cultures A and B (cA and cB) were continued from those shown in Figure 2E to  
738 give a total culture time of 30 days.

739 B. MAK65 cultures C and D (cC and cD) were freshly initiated from blood stabilates.

740 C. Mak98 culture A (cA) was continued directly from Figure 2F.

741 D. Mak98 culture B (cB) was continued from a frozen stabilate from Figure 2F. For genome  
742 analyses results from the two final cultures were >99% identical so the counts were pooled.

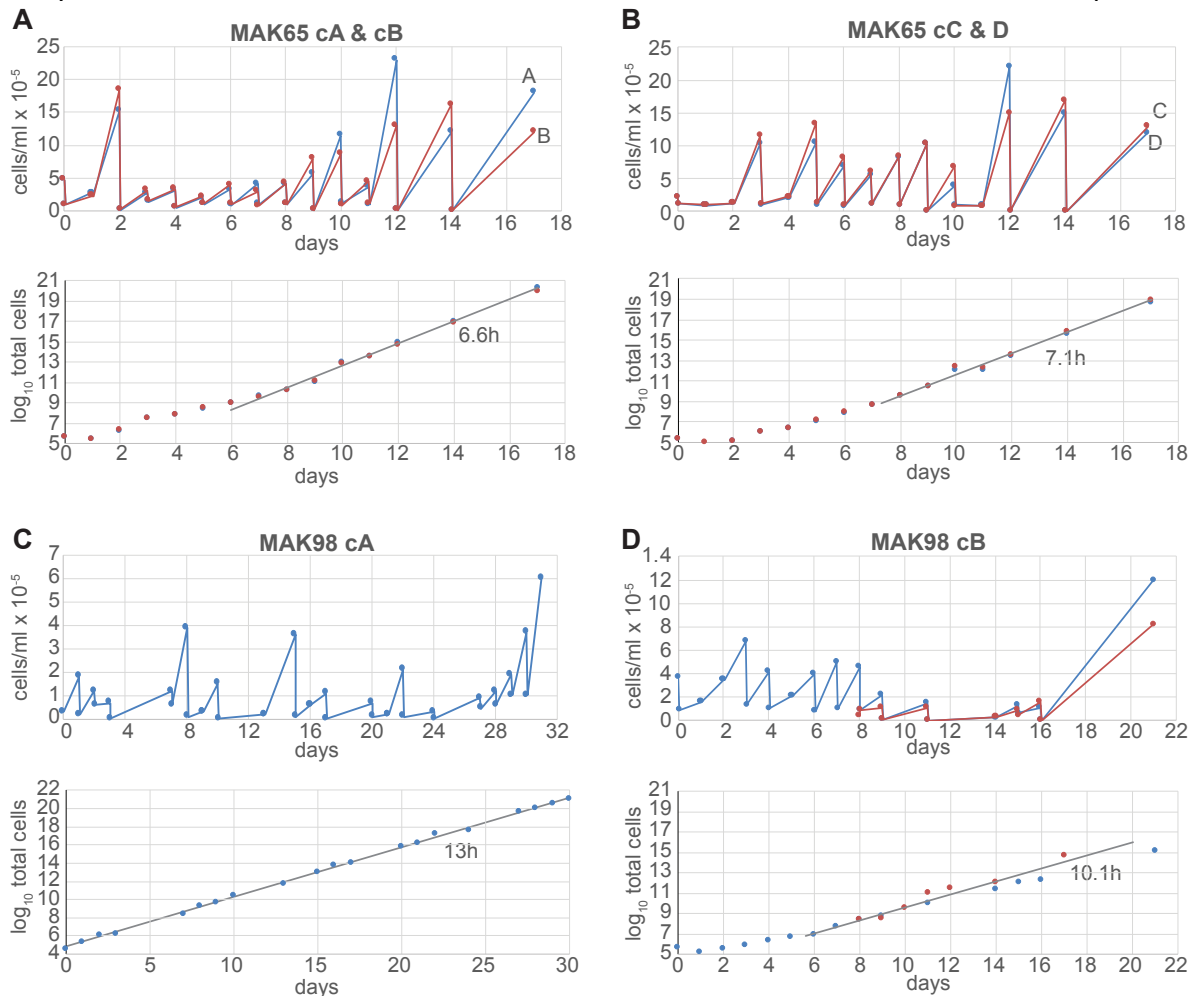

743  
744  
745



746 **S3 Figure**

747 Gene copy number distributions for replicate cultures of MAK65, and copy-number  
748 differences.

749 A-E. Copy numbers were determined as in Figure 3. The approximate chromosome  
750 boundaries are indicated on the plot; columns exceeding 8 copies are runcated at the top of  
751 each panel. Red bars indicate departures from diploidy. The strain or culture is indicated on  
752 each panel.

753 F-H: The plots are the same except that for each culture shown, the copy number in the  
754 starting population was subtracted.

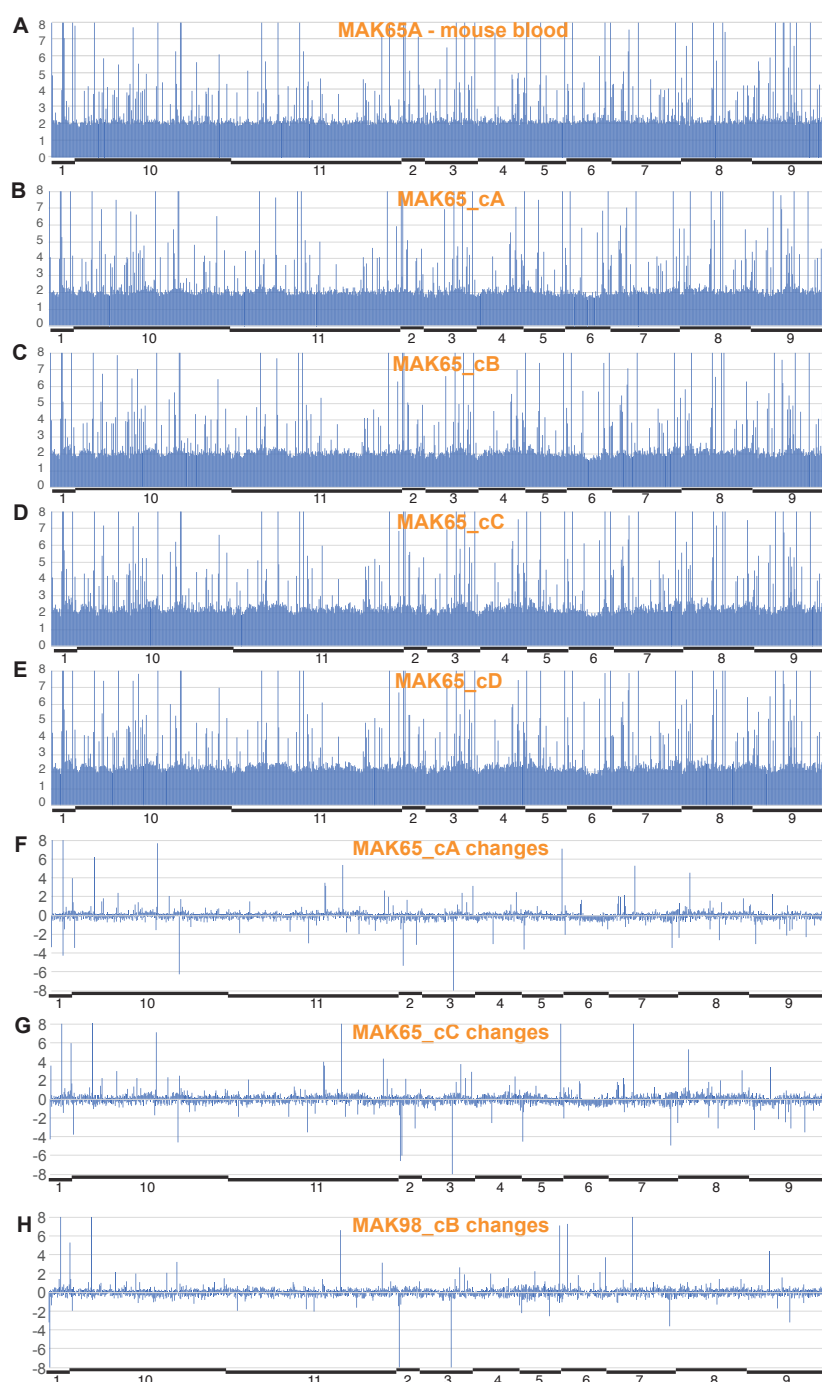

755  
756

757 **S4 Figure**

758 A detailed comparison for one MAK65 culture

759 All reads for MAK65 starting population, and culture A, were allowed to align once to the  
760 TREU927 genome. The resulting mapped reads were visualized using the Integrated genome  
761 viewer (Broad Institute). The region surrounding the gene encoding the major cytosolic  
762 HSP70 is shown. A key is below the alignment and few differences between the genomes  
763 are highlighted. The relative copy number for *HSP70* can be seen by comparing its read  
764 density with that over the surrounding single-copy regions.

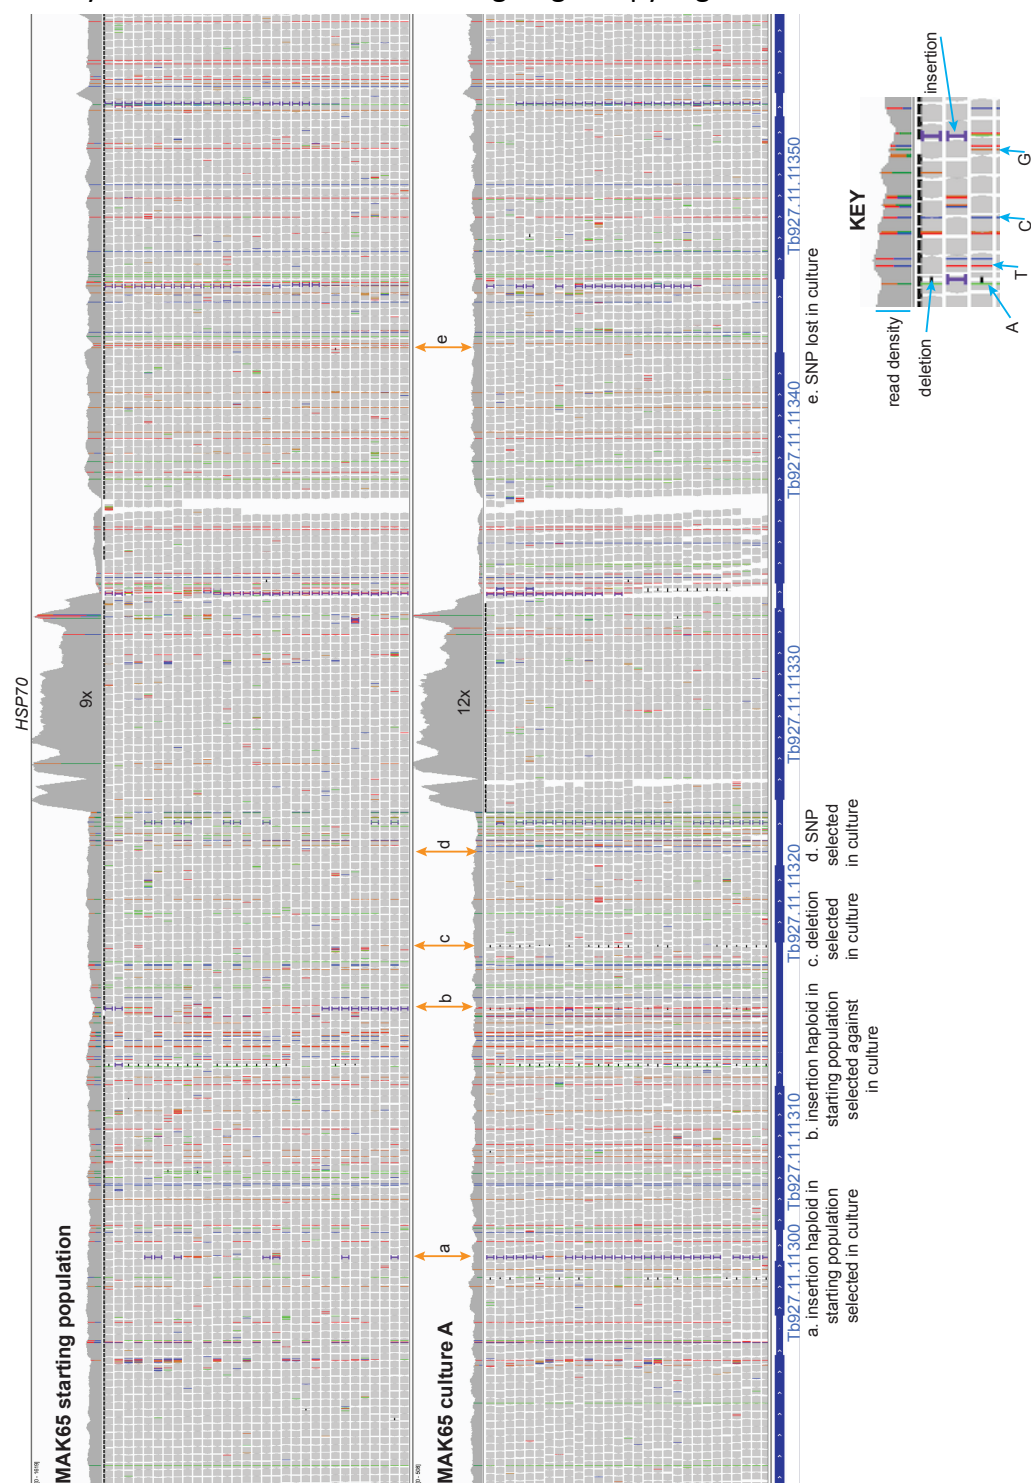

765  
766  
767

768 **S1 Table**

769 Transcriptomes of MAK65 and MAK98 trypanosomes grown in rats. For details see the top  
770 sheet of the table.

771 **S2 Table**

772 Gene copy numbers for MAK65 and MAK98 trypanosomes grown in rats and in culture. For  
773 details see the top sheet of the table.

774
